# Supplementary material
Source: PubMed Central journal article supplement (PMC2895330)
Supplement: NIHMS205414-supplement-1_si_001.pdf [file NIHMS205414-supplement-1_si_001.pdf]

## **Supporting Information**

Supramolecular Protein Structure Determination by Site-Specific Long-Range Intermolecular Solid State NMR Spectroscopy

Andrew J. Nieuwkoop and Chad M. Rienstra\*  
*Department of Chemistry, University of Illinois at Urbana-Champaign,  
600 South Mathews Avenue, Urbana, Illinois 61801*

E-mail: [rienstra@scs.uiuc.edu](mailto:rienstra@scs.uiuc.edu)

## Materials and Methods

### *Sample Preparation*

Samples of GB1 were prepared by bacterial overexpression in two batches: (a)  $^{15}\text{N}$  isotopically labeled in media containing  $^{15}\text{N}$  ammonium chloride and natural abundance glucose, and (b)  $^{13}\text{C}$  isotopically labeled in 1,3- $^{13}\text{C}$ -glycerol and natural abundance sodium carbonate and ammonium chloride. The sample was prepared by physically mixing a 50:50 ratio of these two preparations prior to nanocrystalline precipitation by previously reported methods. Additional samples of  $^{13}\text{C}$  and  $^{15}\text{N}$  enriched GB1 were also prepared in media containing  $^{15}\text{N}$  ammonium chloride and either 2- $^{13}\text{C}$ -glycerol and calcium  $^{13}\text{C}$ -carbonate as reported earlier.<sup>1</sup> Samples (each with ~18 mg protein) were packed into the central 80% of limited speed 3.2 mm Varian rotors (Varian, Inc., Fort Collins, Colorado).

### *Solid-state NMR spectroscopy*

Experiments were performed using a 500 MHz InfinityPlus spectrometer (Varian, Inc., Palo Alto, California and Fort Collins, Colorado) equipped with a 3.2 mm T3 Balun<sup>TM</sup>  $^1\text{H}$ - $^{13}\text{C}$ - $^{15}\text{N}$  MAS probe. Pulse widths ( $\pi/2$ ) for  $^1\text{H}$ ,  $^{13}\text{C}$ , and  $^{15}\text{N}$  were 2.55  $\mu\text{s}$ , 2.9  $\mu\text{s}$ , and 5.5  $\mu\text{s}$  respectively. Spinning was controlled with a Varian MAS controller to  $11,111 \pm 2$  Hz. TPPM decoupling (~75 kHz,  $^1\text{H}$  pulse width 6.6  $\mu\text{s}$ , total phase difference  $15^\circ$ ) was used during acquisition and  $^{15}\text{N}$  evolution. TPPM during REDOR periods was independently optimized at a higher power level (~100 kHz, 5  $\mu\text{s}$ ,  $11^\circ$ ).

ZF-TEDOR 2D planes with 8.64, 16.86 and 21.6 ms of mixing were acquired. Each was digitized to  $3072 \times 10$   $\mu\text{s}$  in the direct ( $^{13}\text{C}$ ) and  $80 \times 180$   $\mu\text{s}$  in the indirect ( $^{15}\text{N}$ ) dimension. Total measurement times were 21.7, 34.6 and 26 hrs.

### *Structure Calculations*

Intermolecular TEDOR restraints were extracted from 2D TEDOR planes by first picking peaks from the longest (21.6 ms)  $^{15}\text{N}$ - $^{13}\text{C}$  mixing experiments and then determining which of these peaks also appeared in the shorter mixing experiments (Figure S1). A small subset of peaks—which we attribute to natural abundance  $^{13}\text{C}$  sites on the  $^{15}\text{N}$  labeled sample—appear at the shortest mixing time; however, these did not prove difficult to differentiate from the labeled sites. Specifically, the maximum  $^{13}\text{C}$ - $^{15}\text{N}$  transfer for TEDOR is theoretically 52%, and we observe on the order of 40% for 1-bond (1.45 Å, at 1.44 ms) and 30% for a 2-bond (2.45 Å, at 5.76 ms)  $^{15}\text{N}$ - $^{13}\text{C}$  distances. Thus the strongest natural abundance peaks will appear at 0.4% and 0.3% respectively of the reference spectrum, and these intensities decay at longer mixing times. For example, the natural abundance peaks observed (Figure S1a, labeled with asterisks) decay below the noise threshold at longer mixing times (Figure S1b and Figure 1). At mixing times of ~20 ms, the natural abundance  $^{13}\text{C}$  sites decay to a small fraction of their initial intensity, and the intermolecular correlations increase in intensity.

Intermolecular TEDOR restraints were assumed to have distance ranges  $<5$  Å for restraints first appearing at 8.64 ms mixing,  $<7$  Å for peaks that were first observed in the 16.86 ms data and  $<8$  Å for those peaks only seen in the 21.6 ms mixing time spectrum. These distances correspond to the longest-range correlations observed in the undiluted  $^{15}\text{N}$ - $^{13}\text{C}$  sample<sup>2</sup> at moderate (~8 ms, 6 Å) and long (~15 ms, 8 Å) mixing times, corrected for the relative amount of sample and signal averaging time; i.e., with 25% of the sample quantity (50% is labeled with either  $^{15}\text{N}$  or  $^{13}\text{C}$ , and only 50% of intermolecular interfaces have the complementary labeling to enable  $^{15}\text{N}$ - $^{13}\text{C}$  correlations) but twice the signal

averaging time, we observed a ~2-fold decrease in signal to noise. Therefore we adjusted the distance threshold (assuming the linear rate regime of TEDOR buildup) by  $2^{(-1/3)} = \sim 0.8$ .

Correlations were assigned in a manner explicitly taking ambiguity into account; possible assignments included any  $^{15}\text{N}$  resonance within 0.25 ppm and any  $^{13}\text{C}$  resonance within 0.15 ppm of the observed crosspeak (corresponding to half the average linewidths in each dimension). This procedure resulted in restraints with up to four-fold ambiguity in each dimension. For example, the peak at 123.3 ppm  $^{15}\text{N}$ , and 173.1 ppm  $^{13}\text{C}$  (Figures 1, S1) has nine possible assignments (three-fold degenerate in each dimension): Y3N, K13N or D47N correlated to K4C, G9C or T11C. However, 20 restraints were completely unambiguous, while 18 were two-fold and 14 were threefold degenerate. The remaining 36 were four or more fold degenerate (see Table S1).

Figure S3 and S4 illustrate the results for the trigonal and orthorhombic crystal packing geometries. From these refined structures each restraint could be unambiguously assigned to one possible  $^{15}\text{N}$ - $^{13}\text{C}$  pair within 8 Å, for the example above a  $\beta 3$ - $\beta 2'$  correlation D47-T11C. Some of these assigned restraint lists are shown in Figure S5 and they are all listed the last column of Table S1. Despite these assignments, ambiguous restraint lists were used for all structure calculations and can be found in the BMRB listing for this structure, 16836.

The crystal lattices used as the starting structures for the trigonal<sup>3</sup> (2QMT) and orthorhombic<sup>4</sup> (2GI9) calculations were generated using SwissPDB viewer<sup>5</sup> (<http://www.expasy.org/spdbv/>) selecting all GB1 monomers with  $^{15}\text{N}$  sites within 8 Å of a  $^{13}\text{C}$  site on the central monomer. In both cases a total of six GB1 molecules were found

to have  $^{15}\text{N}$ - $^{13}\text{C}$  pairs less than 8 Å apart. In the case of the trigonal packing one of those monomers was only restrained by one correlation, and as such did not converge to a unique conformation in the final calculations. Thus in Figures S3 and S6 only the five well-restrained monomers are shown. Similarly for the orthorhombic lattice the sixth monomer was not restrained at all and is not shown in Figures S4 and S6. Therefore, for the *de novo* annealing calculation five copies of the lowest energy model from the intramolecular TEDOR structure<sup>2</sup> (2KQ4) were manually translated and rotated into a grid with four monomers in plane and one above them out of plane. VMD-XPLOR<sup>6</sup> (<http://vmd-xplor.cit.nih.gov/>) was used to create the initial conditions for the *in silico* annealing. All monomers were ~20 Å apart, and positioned in a rough array around the central GB1, corresponding to the four areas of intermolecular contact observed. The calculations proved to be relatively insensitive to starting conditions, converging to a similar structure from multiple starting orientations, with the only requirement being all monomers must be separated by an equal distance from the central monomer.

Simulated annealing calculations were performed using the python extension of XPLOR-NIH.<sup>7</sup> Intermolecular TEDOR restraints were applied ambiguously from the central GB1 molecule to any other GB1, enforcing the intermolecular nature of the data. Intramolecular restraints were applied to each monomer and included TEDOR distances and TALOS dihedral angle restraints. A symmetry potential was used to enforce similarity between all monomers in each calculation, as required by our NMR data which shows only a single set of peaks for each residue. For the docking procedure this potential was also used to fix the internal coordinates of the monomers: by fixing the atom positions of the central monomer and applying a large symmetry potential the center of

mass and orientation of the peripheral GB1 monomers were allowed to change while keeping the internal structure fixed. High temperature dynamic times of 20 ps were used for the trigonal and *in silico* calculations and 40 ps for the orthorhombic to trigonal annealing followed by annealing times of 60 ps. In all cases 600 structures were calculated with the set of lowest 10 energy structures reported. bbRMSDs reported for these sets are the average of the 10 RMSDs for the backbone aligned in VMD-XPLOR, reported error is the standard deviation. In the cases where bbRMSDs are reported to crystal structures the same structures are aligned to the X-ray crystal lattice in VMD-XPLOR and the RMSD of all 10 structures, to the X-ray was reported.

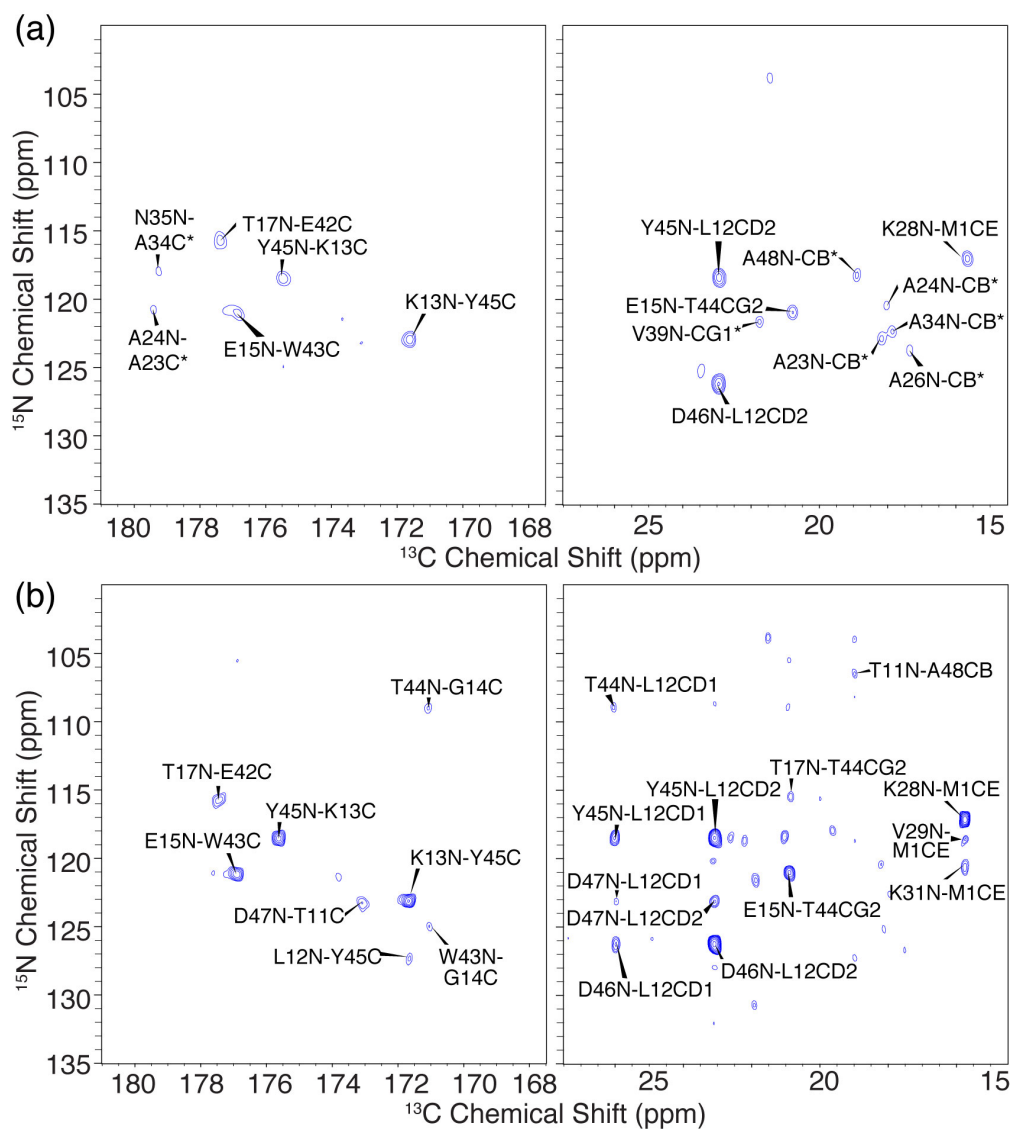

**Figure S1.** 2D  $^{13}\text{C}$ - $^{15}\text{N}$  planes from the 3D ZF-TEDOR spectrum collected with 50% U- $^{15}\text{N}$  GB1 physically mixed with 50% 1,3- $^{13}\text{C}$  glycerol labeled GB1. TEDOR mixing times of (a) 8.64 ms and (b) 16.48 ms are shown. Spectra were acquired at 500 MHz ( $^1\text{H}$ ) with 21.6 ms  $^{15}\text{N}$ - $^{13}\text{C}$  mixing, 14.4 ms  $t_{\text{1max}}$  ( $^{15}\text{N}$  evolution) and 30.7 ms  $^{13}\text{C}$  acquisition time. Total measurement time was (a) 21.7 and (b) 34.6 hours. Peaks in (a) labeled with asterisks are attributed to natural abundance  $^{13}\text{C}$  in the  $^{15}\text{N}$  labeled samples. These weak peaks decrease in intensity at longer than 8 ms mixing times and therefore are concluded to be intramolecular and were not included in the restraint lists for the structure calculations.

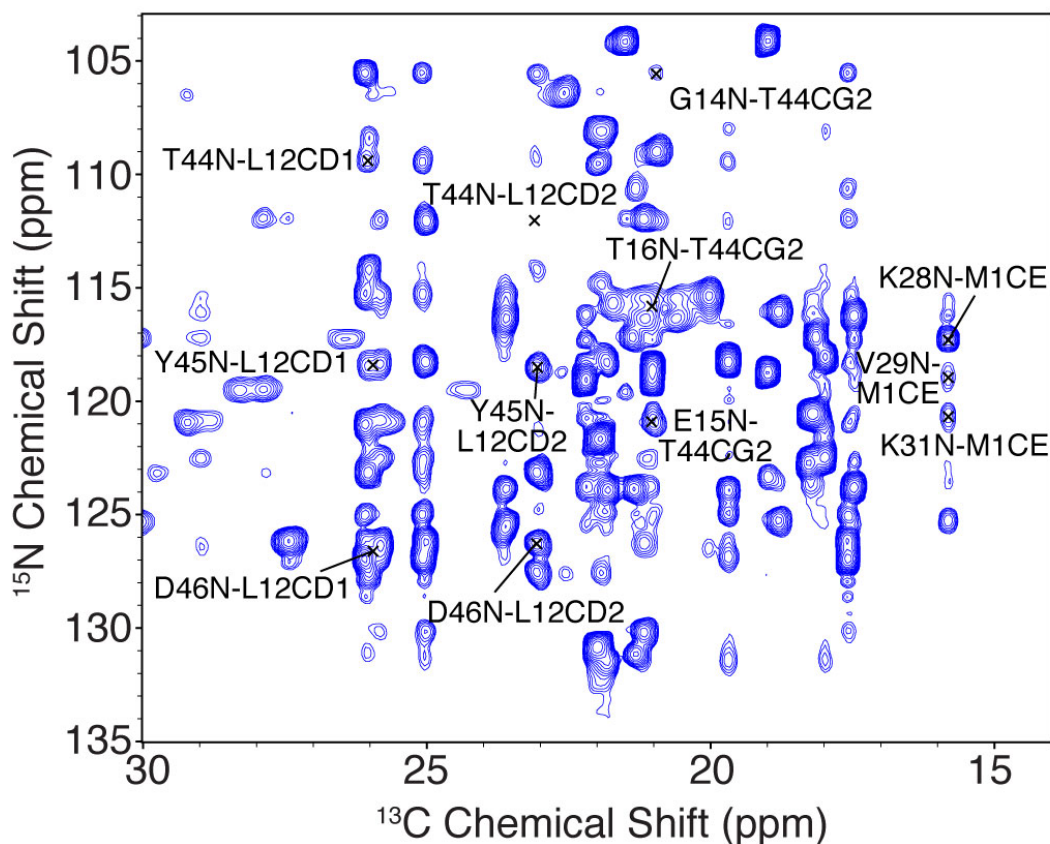

**Figure S2.** 2D TEDOR correlation spectrum of 1,3- $^{13}\text{C}$  glycerol,  $^{15}\text{N}$  labeled GB1 with 14.4 ms mixing time. Data were acquired with 28.8 ms  $t_{\text{1max}}$  ( $^{15}\text{N}$  evolution) and 46.1 ms  $^{13}\text{C}$  acquisition at 500 MHz  $^1\text{H}$  frequency with a 11,111 Hz MAS rate and a total measurement time of 40.5 hours. This spectrum is the longest mixing undiluted TEDOR experiment reported earlier.<sup>2</sup> In addition to strong intramolecular peaks, correlations which also appear in the intermolecular TEDOR can be attributed to intermolecular contacts and are labeled with X's. In some cases, the intermolecular peak was obscured by strong intramolecular peaks, in which case the X is used to illustrate peaks that were impossible to observe in the uniformly labeled data.



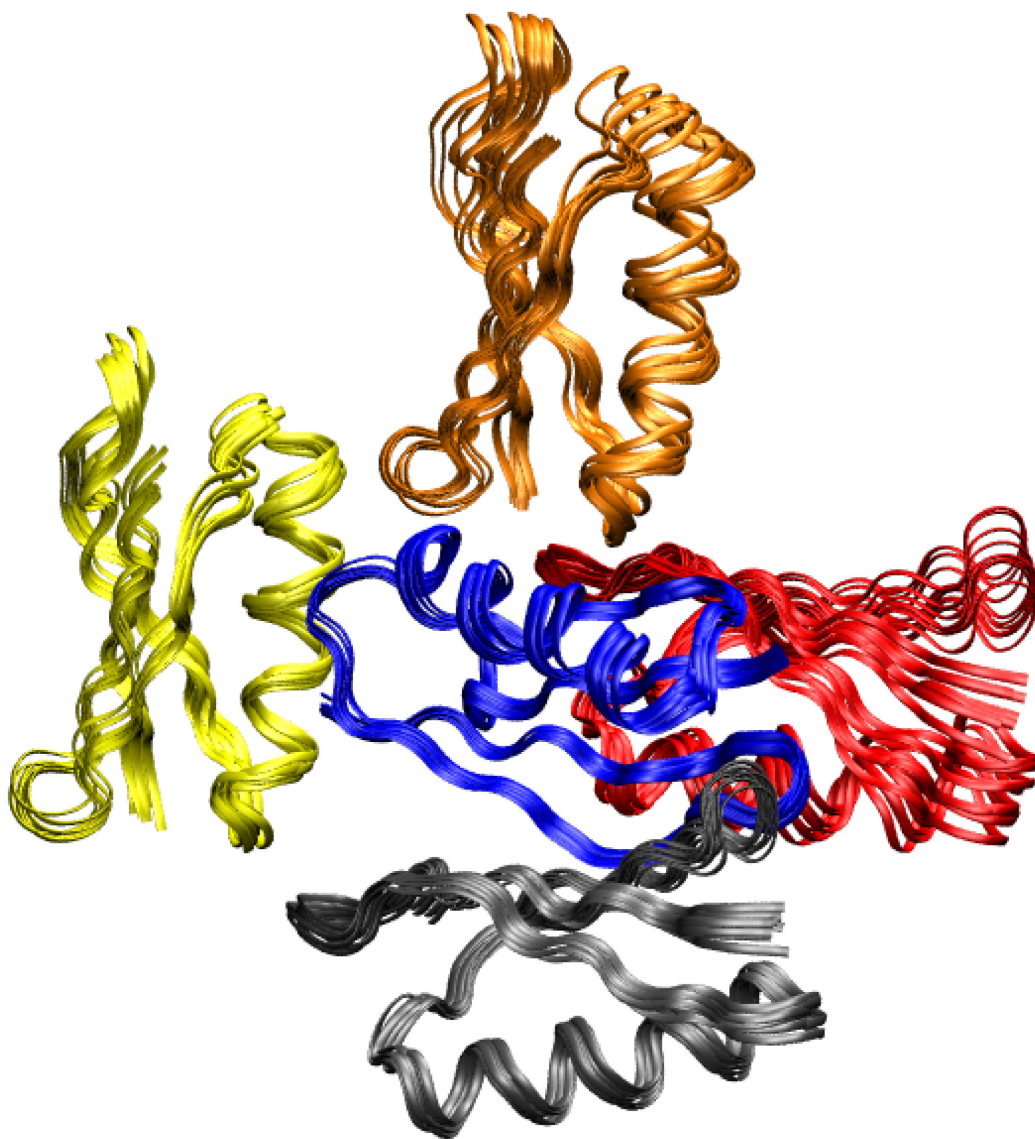

**Figure S3.** Quaternary structure of GB1 (10 lowest energy structures out of 600) as determined by simulated annealing structure calculations initiated from the trigonal crystal lattice (PDB ID 2QMT). Ambiguous intermolecular TEDOR restraints were used for which all possible  $^{15}\text{N}$  and  $^{13}\text{C}$  assignments for a given correlation were included. One monomer was poorly restrained in the calculation, with only one correlation in the intermolecular TEDOR data, and is not shown. Backbone RMSD is  $0.8 \pm 0.3 \text{ \AA}$  for the 5 monomers shown here.

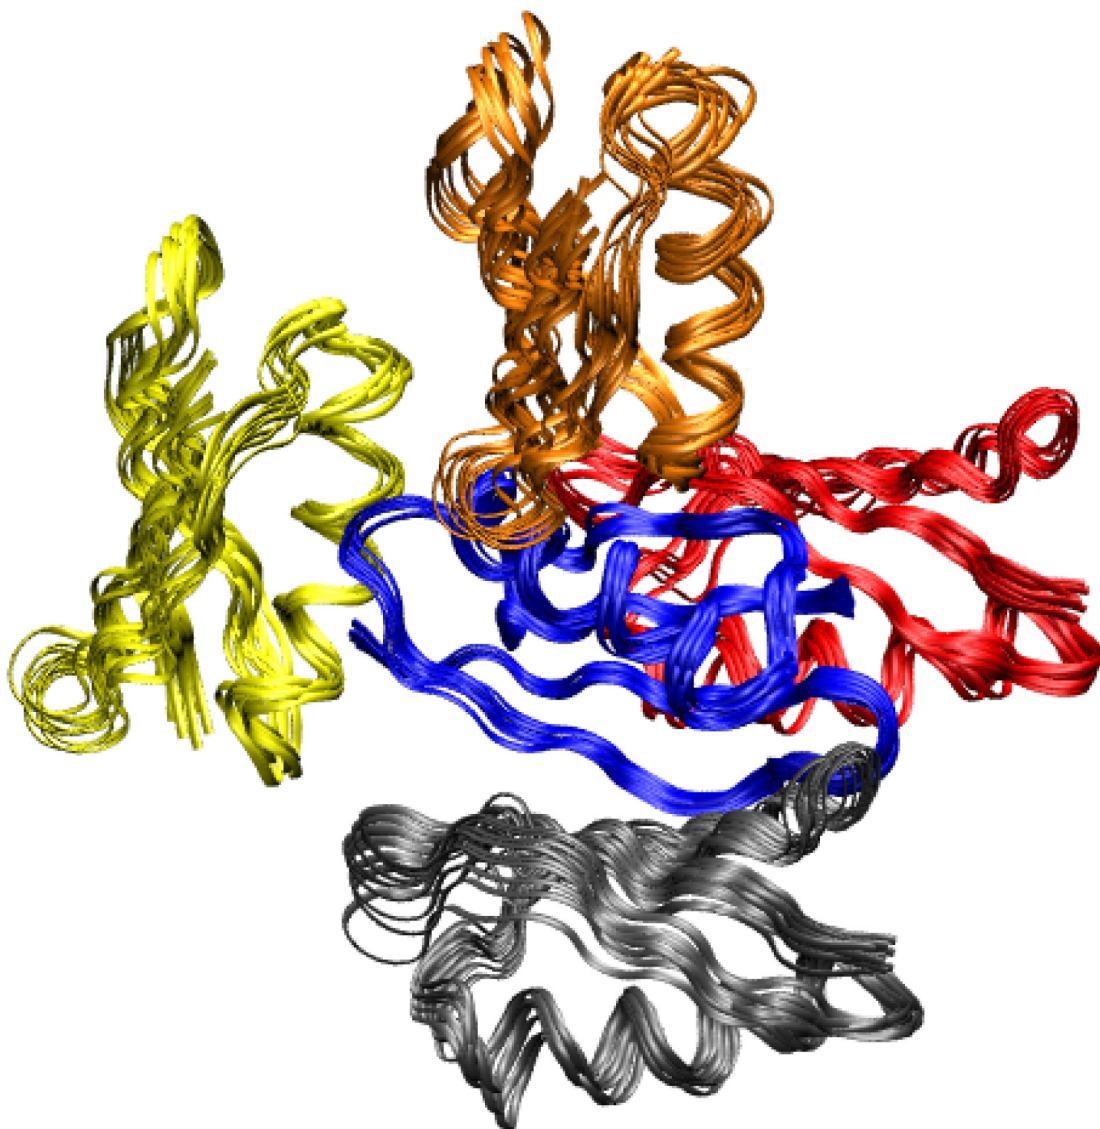

**Figure S4.** Quaternary structure of GB1 (10 lowest energy structures out of 600) as determined by simulated annealing structure calculations initiated from the orthorhombic crystal lattice (PDB ID 2GI9). Ambiguous intermolecular TEDOR restraints were used for which all possible  $^{15}\text{N}$  and  $^{13}\text{C}$  assignments for a given correlation were included. One monomer was not restrained in the calculation, and is not shown. Backbone RMSD is  $1.4 \pm 0.4 \text{ \AA}$  for the 5 monomers shown here.

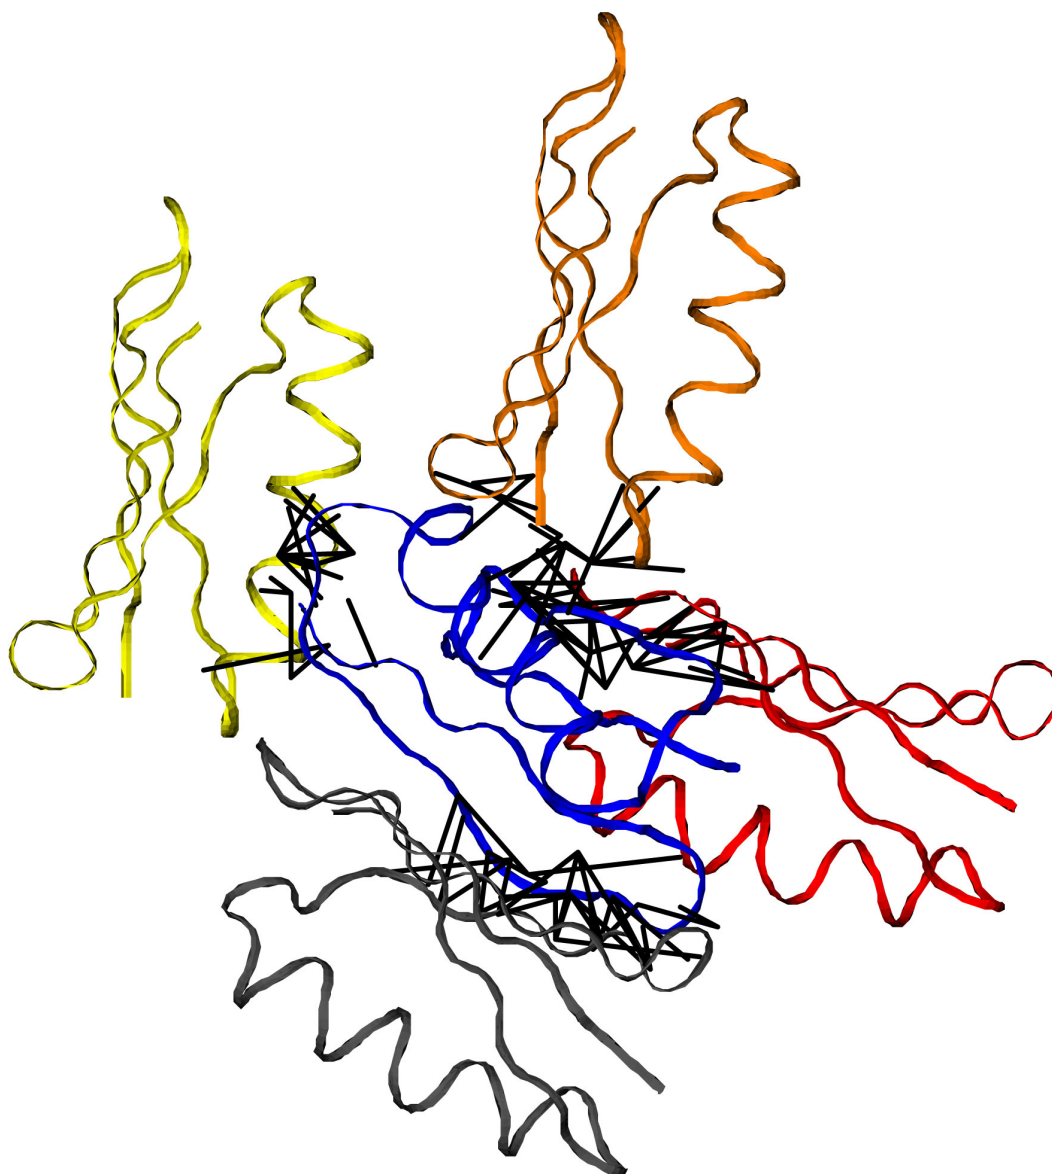

**Figure S5.** Intermolecular TEDOR restraints used in XPLOR-NIH calculations. Restraints are shown in black on the lowest energy structure initiated with the trigonal lattice (Figure S3). All restraints are derived from TEDOR experiments on a sample of 50% U-<sup>15</sup>N GB1 physically mixed with 50% 1,3-<sup>13</sup>C glycerol labeled GB1 (Figure 1, Figure S1).

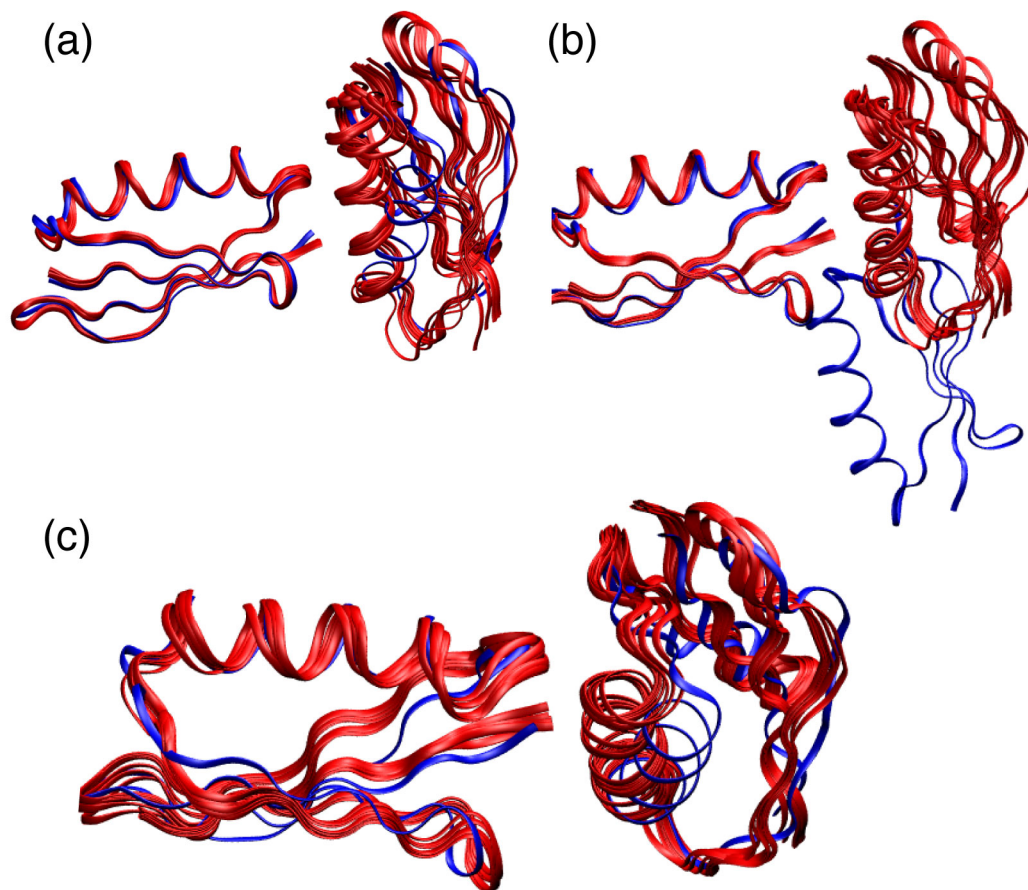

**Figure S6.** Two monomers (10 lowest energy out of 600 calculated) taken from the trigonal calculation with intermolecular TEDOR restraint lists. These two monomers (red) aligned by the central monomer overlaid with (a) the trigonal (2QMT, blue) and (b) the orthorhombic (2GI9, blue) X-ray crystal lattices. Backbone RMSDs for the central monomers are (a)  $0.73 \pm 0.04$  Å and (b)  $0.73 \pm 0.04$  Å. Backbone RMSDs for both monomers shown are (a)  $4.1 \pm 0.4$  Å and (b)  $13.6 \pm 0.3$  Å. When aligned by both monomers to the trigonal crystal structure (c) the backbone RMSD is  $2.7 \pm 0.3$  Å.



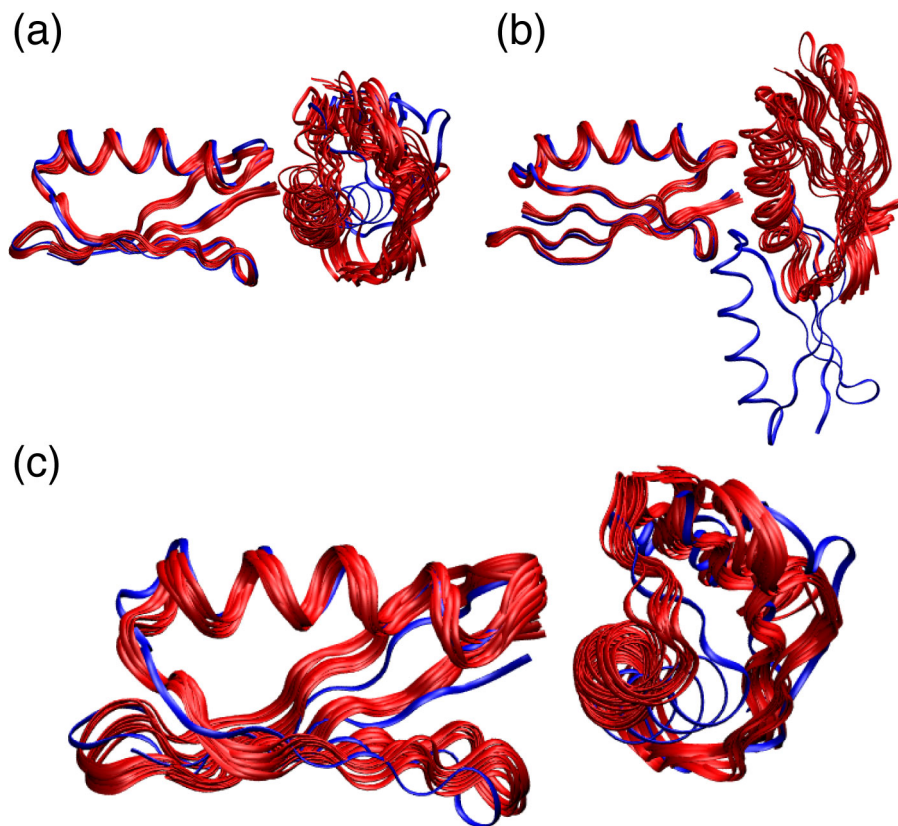

**Figure S7.** Two monomers (10 lowest energy out of 600 calculated) taken from the orthorhombic calculation with intermolecular TEDOR restraint lists. These two monomers (red) aligned by the central monomer overlaid with (a) the trigonal (2QMT, blue) and (b) the orthorhombic (2G19, blue) X-ray crystal lattices. Backbone RMSDs for the central monomers are (a)  $1.00 \pm 0.07$  Å and (b)  $0.94 \pm 0.07$  Å. Backbone RMSDs for both monomers shown are (a)  $4.7 \pm 0.4$  Å and (b)  $15.8 \pm 0.7$  Å. When aligned by both monomers to the trigonal crystal structure (c) the backbone RMSD is  $2.8 \pm 0.3$  Å.

**Table S1.** Intermolecular TEDOR Restraints.

| <b>Residue/Atom</b> | <b>Residue/Atom</b>   | <b>Distance (Å)</b> | <b>Degeneracy</b> | <b>Manual Assignment</b> |
|---------------------|-----------------------|---------------------|-------------------|--------------------------|
| 1CE                 | 31N                   | 5                   | 1                 | K31N-M1CE                |
| 31N                 | 1CE                   | 5                   | 1                 | K31N-M1CE                |
| 20CB                | 31NZ                  | 8                   | 1                 | K31NZ-A20CB              |
| 31NZ                | 20CB                  | 8                   | 1                 | K31NZ-A20CB              |
| 1CB                 | 31NZ                  | 5                   | 1                 | K31NZ-M1CB               |
| 31NZ                | 1CB                   | 5                   | 1                 | K31NZ-M1CB               |
| 1CE                 | 31NZ                  | 5                   | 1                 | K31NZ-M1CE               |
| 31NZ                | 1CE                   | 5                   | 1                 | K31NZ-M1CE               |
| 21CG1               | 31NZ                  | 5                   | 1                 | K31NZ-V21CG1             |
| 31NZ                | 21CG1                 | 5                   | 1                 | K31NZ-V21CG1             |
| 12N                 | 48CB                  | 5                   | 1                 | L12N-A48CB               |
| 48CB                | 12N                   | 5                   | 1                 | L12N-A48CB               |
| 1N                  | 27CG                  | 7                   | 1                 | M1N-A27CG                |
| 27CG                | 1N                    | 7                   | 1                 | M1N-A27CG                |
| 1N                  | 27CD                  | 5                   | 1                 | M1N-E27CD                |
| 27CD                | 1N                    | 5                   | 1                 | M1N-E27CD                |
| 11N                 | 48CB                  | 8                   | 1                 | T11N-A48CB               |
| 48CB                | 11N                   | 8                   | 1                 | T11N-A48CB               |
| 12CD2               | 44N                   | 7                   | 1                 | T44N-L12CD2              |
| 44N                 | 12CD2                 | 7                   | 1                 | T44N-L12CD2              |
| 20N                 | 31CG or 31CG          | 7                   | 2                 | A20N-K31CG               |
| 31CG or 6CG1        | 20N                   | 7                   | 2                 | A20N-K31CG               |
| 46N or 6N           | 12CD2                 | 5                   | 2                 | D46N-L12CD2              |
| 12CD2               | 46N or 6N             | 5                   | 2                 | D46N-L12CD2              |
| 14N                 | 44CG2 or 29CG1        | 5                   | 2                 | G14N-T44CG2              |
| 44CG2 or 29CG1      | 14N                   | 5                   | 2                 | G14N-T44CG2              |
| 14N                 | 43C or 26C            | 5                   | 2                 | G14N-W43C                |
| 43C or 26C          | 14N                   | 5                   | 2                 | G14N-W43C                |
| 1CE                 | 28N or 25N            | 5                   | 2                 | K28N-M1CE                |
| 28N or 25N          | 1CE                   | 5                   | 2                 | K28N-M1CE                |
| 12N                 | 45C or 16C            | 5                   | 2                 | L12N-Y45C                |
| 45C or 16C          | 12N                   | 5                   | 2                 | L12N-Y45C                |
| 1N                  | 24CB or 23CB          | 8                   | 2                 | M1N-A24CB                |
| 24CB or 23CB        | 1N                    | 8                   | 2                 | M1N-A24CB                |
| 12CD2               | 53N or 51N            | 7                   | 2                 | T53N-L12CD2              |
| 53N or 51N          | 12CD2                 | 7                   | 2                 | T53N-L12CD2              |
| 15C                 | 43N or 8N             | 8                   | 2                 | W43N-E15C                |
| 43N or 8N           | 15C                   | 8                   | 2                 | W43N-E15C                |
| 46N                 | 12CD1 or 7CD1 or 13CG | 5                   | 3                 | D46N-L12CD1              |
| 12CD2               | 47N or 3N or 13N      | 5                   | 3                 | D47N-L12CD2              |
| 47N or 3N or 13N    | 12CD2                 | 5                   | 3                 | D47N-L12CD2              |
| 31NZ                | 20C or 42C or 32C     | 7                   | 3                 | K31NZ-A20C               |
| 20C or 42C or 32C   | 31NZ                  | 7                   | 3                 | K31NZ-A20C               |
| 44N                 | 14C or 18C or 1C      | 5                   | 3                 | T44N-G14C                |

| <b>Residue/Atom</b>          | <b>Residue/Atom</b>          | <b>Distance (Å)</b> | <b>Degeneracy</b> | <b>Manual Assignment</b> |
|------------------------------|------------------------------|---------------------|-------------------|--------------------------|
| 14C or 18C or 1C             | 44N                          | 5                   | 3                 | T44N-G14C                |
| 44N                          | 7CD1 or 13CG or 12CD1        | 5                   | 3                 | T44N-L12CD1              |
| 12CD1 or 7CD1 or 13CG        | 44N                          | 5                   | 3                 | T44N-L12CD1              |
| 12CD2                        | 45N or 30N or 54N            | 5                   | 3                 | Y45N-L12CD2              |
| 45N or 30N or 54N            | 12CD2                        | 5                   | 3                 | Y45N-L12CD2              |
| 11CG2                        | 45N or 30N or 54N            | 7                   | 3                 | Y45N-T11CG2              |
| 11CG2                        | 45N or 30N or 54N            | 7                   | 3                 | Y45N-T11CG2              |
| 45N or 30N or 54N            | 11CG2                        | 7                   | 3                 | Y45N-T11CG2              |
| 1CE                          | 42N or 45N or 48N or 30N     | 7                   | 4                 | F30N-M1CE                |
| 45N or 30N or 42N or 48N     | 1CE                          | 7                   | 4                 | F30N-M1CE                |
| 13N or 47N                   | 45C or 16C                   | 5                   | 4                 | K13N-Y45C                |
| 45C or 16C                   | 13N or 47N                   | 5                   | 4                 | K13N-Y45C                |
| 31NZ                         | 21C or 3C or 40C or 2C       | 5                   | 4                 | K31NZ-V21C               |
| 21C or 3C or 2C or 40C       | 31NZ                         | 5                   | 4                 | K31NZ-V21C               |
| 19N or 2N                    | 24CB or 23CB                 | 7                   | 4                 | Q2N-A23CB                |
| 24CB or 23CB                 | 2N or 19N                    | 8                   | 4                 | Q2N-A23CB                |
| 46N or 6N                    | 12CD1 or 7CD1 or 13CG        | 5                   | 6                 | D46N-L12CD1              |
| 12CD1 or 7CD1 or 13CG        | 46N or 6N                    | 5                   | 6                 | D46N-L12CD1              |
| 36CB or 8CB                  | 32NE2 or 17N or 22N          | 7                   | 6                 | Q32NE2-D36CB             |
| 32NE2 or 17N or 22N          | 36CB or 8CB                  | 7                   | 6                 | Q32NE2-D36CB             |
| 44CG2 or 29CG1               | 16N or 22N or 32NE2          | 7                   | 6                 | T16N-T44CG2              |
| 16N or 22N or 32NE2          | 44CG2 or 29CG1               | 7                   | 6                 | T16N-T44CG2              |
| 43N or 8N                    | 14C or 18C or 1C             | 5                   | 6                 | W43N-G14C                |
| 14C or 18C or 1C             | 43N or 8N                    | 5                   | 6                 | W43N-G14C                |
| 46N or 6N                    | 12CA or 47CA or 24CA or 23CA | 5                   | 8                 | D46N-L12CA               |
| 12CA or 47CA or 24CA or 23CA | 46N or 6N                    | 5                   | 8                 | D46N-L12CA               |
| 44CG2 or 29CG1               | 15N or 32N or 36N or 10N     | 5                   | 8                 | E15N-T44CG2              |
| 15N or 32N or 36N or 10N     | 44CG2 or 29CG1               | 5                   | 8                 | E15N-T44CG2              |
| 43C or 26C                   | 15N or 32N or 36N or 10N     | 5                   | 8                 | E15N-W43C                |
| 15N or 32N or 36N or 10N     | 43C or 26C                   | 5                   | 8                 | E15N-W43C                |
| 12CD1 or 7CD1 or 13CG        | 47N or 3N or 13N             | 7                   | 9                 | D47N-L12CD1              |
| 47N or 3N or 13N             | 12CD1 or 7CD1 or 13CG        | 7                   | 9                 | D47N-L12CD1              |
| 11C or 9C or 4C              | 47N or 3N or 13N             | 5                   | 9                 | D47N-T11C                |
| 47N or 3N or 13N             | 9C or 4C or 11C              | 5                   | 9                 | D47N-T11C                |
| 12CD1 or 7CD1 or 13CG        | 45N or 30N or 54N            | 5                   | 9                 | Y45N-L12CD1              |
| 45N or 30N or 54N            | 7CD1 or 13CG or 12CD1        | 5                   | 9                 | Y45N-L12CD1              |
| 47N or 3N or 13N             | 12CA or 47CA or 24CA or 23CA | 5                   | 12                | D47N-L12CA               |
| 12CA or 47CA or 24CA or 23CA | 47N or 3N or 13N             | 5                   | 12                | D47N-L12CA               |

| <b>Residue/Atom</b>             | <b>Residue/Atom</b>             | <b>Distance (Å)</b> | <b>Degeneracy</b> | <b>Manual Assignment</b> |
|---------------------------------|---------------------------------|---------------------|-------------------|--------------------------|
| 14C or 18C or 1C                | 42N or 45N or 48N or 30N        | 8                   | 12                | E42N-G14C                |
| 45N or 30N or 42N or 48N        | 14C or 18C or 1C                | 8                   | 12                | E42N-G14C                |
| 19C or 25C or 13C or 49C or 52C | 45N or 30N or 54N               | 5                   | 15                | Y45N-K13C                |
| 45N or 30N or 54N               | 19C or 25C or 13C or 49C or 52C | 5                   | 15                | Y45N-K13C                |
| 12CA or 47CA or 24CA or 23CA    | 45N or 30N or 42N or 48N        | 5                   | 16                | A48N-L12CA               |
| 45N or 30N or 42N or 48N        | 12CA or 47CA or 24CA or 23CA    | 5                   | 16                | A48N-L12CA               |



**Table S2.** Intramolecular TEDOR Distance Restraints

| Residue i | Atom | Residue j | Atom | Distance (Å) | Uncertainty (Å) | Label        |
|-----------|------|-----------|------|--------------|-----------------|--------------|
| 1         | N    | 1         | CA   | 1.48         | 0.10            | M1N-CA       |
| 1         | N    | 1         | CB   | 2.44         | 0.10            | M1N-CB       |
| 1         | N    | 1         | CE   | 3.77         | 0.60            | M1N-CE       |
| 1         | N    | 1         | CG   | 3.61         | 0.50            | M1N-CG       |
| 1         | N    | 1         | CB   | 2.44         | 0.10            | M1N-CB       |
| 1         | N    | 1         | CG   | 3.74         | 0.20            | M1N-CG       |
| 1         | N    | 3         | CG   | 6.34         | 3.28            | M1N-Y3CG     |
| 1         | N    | 19        | CD   | 4.14         | 0.24            | M1N-E19CD    |
| 1         | N    | 20        | CB   | 6.16         | 3.33            | M1N-A20CB    |
| 1         | N    | 20        | CA   | 5.20         | 4.20            | M1N-A20CA    |
| 2         | N    | 1         | CB   | 3.32         | 0.10            | Q2N-M1CB     |
| 2         | N    | 1         | CE   | 4.20         | 1.04            | Q2N-M1CE     |
| 2         | N    | 1         | CG   | 3.01         | 0.10            | Q2N-M1CG     |
| 2         | N    | 1         | CB   | 3.34         | 0.23            | Q2N-M1CB     |
| 2         | N    | 1         | CE   | 4.06         | 3.06            | Q2N-M1CE     |
| 2         | N    | 1         | CG   | 2.86         | 0.10            | Q2N-M1CG     |
| 2         | N    | 2         | CA   | 1.44         | 0.10            | Q2N-CA       |
| 2         | NE2  | 2         | CD   | 1.82         | 0.82            | Q2NE2-CD     |
| 2         | N    | 2         | CG   | 3.12         | 0.10            | Q2N-CG       |
| 2         | NE2  | 2         | CG   | 2.78         | 0.10            | Q2NE2-CG     |
| 2         | N    | 2         | CD   | 5.18         | 0.82            | Q2N-CD       |
| 2         | NE2  | 2         | CD   | 1.75         | 0.75            | Q2NE2-CD     |
| 2         | N    | 3         | CA   | 4.13         | 1.02            | Q2N-Y3CA     |
| 2         | N    | 3         | CG   | 4.65         | 0.48            | Q2N-Y3CG     |
| 2         | NE2  | 17        | CG2  | 4.96         | 0.10            | Q2NE2-T17CG2 |
| 2         | NE2  | 19        | CD   | 5.53         | 0.25            | Q2NE2-E19CD  |
| 3         | N    | 1         | CE   | 5.42         | 1.45            | Y3N-M1CE     |
| 3         | N    | 1         | CG   | 4.82         | 1.41            | Y3N-M1CG     |
| 3         | N    | 2         | CA   | 2.55         | 0.11            | Y3N-Q2CA     |
| 3         | N    | 2         | CA   | 2.33         | 0.10            | Y3N-Q2CA     |
| 3         | N    | 3         | CA   | 1.44         | 0.10            | Y3N-CA       |
| 3         | N    | 3         | CG   | 3.07         | 0.34            | Y3N-CG       |
| 3         | N    | 18        | CG2  | 4.77         | 0.35            | Y3N-T18CG2   |
| 3         | N    | 19        | CD   | 7.08         | 0.35            | Y3N-E19CD    |
| 4         | N    | 3         | CA   | 2.57         | 0.19            | K4N-Y3CA     |
| 4         | N    | 3         | CG   | 4.15         | 0.27            | K4N-Y3CG     |
| 4         | N    | 4         | CA   | 1.43         | 0.10            | K4N-CA       |
| 4         | N    | 4         | CB   | 2.43         | 0.21            | K4N-CB       |
| 4         | N    | 4         | CD   | 4.87         | 0.10            | K4N-CD       |
| 4         | NZ   | 4         | CD   | 2.95         | 1.95            | K4NZ-CD      |
| 4         | N    | 4         | CG   | 3.94         | 0.10            | K4N-CG       |
| 4         | N    | 4         | CA   | 1.44         | 0.10            | K4N-CA       |
| 4         | N    | 4         | CB   | 2.42         | 0.10            | K4N-CB       |
| 4         | NZ   | 4         | CD   | 3.25         | 1.10            | K4NZ-CD      |

| Residue i | Atom | Residue j | Atom | Distance (Å) | Uncertainty (Å) | Label       |
|-----------|------|-----------|------|--------------|-----------------|-------------|
| 4         | N    | 4         | CG   | 3.10         | 1.10            | K4N-CG      |
| 4         | NZ   | 6         | CD1  | 4.60         | 0.15            | K4NZ-I6CD1  |
| 4         | NZ   | 6         | CG2  | 7.30         | 5.73            | K4NZ-I6CG2  |
| 4         | N    | 6         | CD1  | 6.89         | 1.83            | K4N-I6CD1   |
| 4         | NZ   | 6         | CD1  | 5.05         | 0.44            | K4NZ-I6CD1  |
| 4         | NZ   | 15        | CD   | 3.71         | 0.10            | K4NZ-E15CD  |
| 4         | NZ   | 17        | CG2  | 6.12         | 0.10            | K4NZ-T17CG2 |
| 4         | N    | 17        | CG2  | 4.90         | 3.90            | K4N-T17CG2  |
| 4         | N    | 51        | CG2  | 5.15         | 0.40            | K4N-T51CG2  |
| 4         | N    | 51        | CG2  | 5.58         | 0.51            | K4N-T51CG2  |
| 4         | NZ   | 51        | CG2  | 6.40         | 1.66            | K4NZ-T51CG2 |
| 4         | N    | 52        | CG   | 6.05         | 1.49            | K4N-F52CG   |
| 5         | N    | 4         | CB   | 3.50         | 0.44            | L5N-K4CB    |
| 5         | N    | 4         | CD   | 5.11         | 0.10            | L5N-K4CD    |
| 5         | N    | 4         | CG   | 3.43         | 0.10            | L5N-K4CG    |
| 5         | N    | 4         | CA   | 2.54         | 0.10            | L5N-K4CA    |
| 5         | N    | 4         | CB   | 3.34         | 0.12            | L5N-K4CB    |
| 5         | N    | 4         | CD   | 5.25         | 4.25            | L5N-K4CD    |
| 5         | N    | 5         | CA   | 1.42         | 0.10            | L5N-CA      |
| 5         | N    | 5         | CG   | 3.05         | 1.10            | L5N-CG      |
| 5         | N    | 16        | CG2  | 4.83         | 0.98            | L5N-T16CG2  |
| 5         | N    | 16        | CG2  | 5.18         | 1.26            | L5N-T16CG2  |
| 5         | N    | 17        | CG2  | 5.46         | 0.10            | L5N-T17CG2  |
| 5         | N    | 18        | CG2  | 6.15         | 1.88            | L5N-T18CG2  |
| 5         | N    | 30        | CG   | 5.68         | 0.62            | L5N-F30CG   |
| 6         | N    | 5         | CD2  | 3.29         | 0.10            | I6N-L5CD2   |
| 6         | N    | 5         | CD2  | 3.19         | 2.19            | I6N-L5CD2   |
| 6         | N    | 6         | CA   | 1.44         | 0.10            | I6N-CA      |
| 6         | N    | 6         | CB   | 2.61         | 0.10            | I6N-CB      |
| 6         | N    | 6         | CD1  | 3.39         | 0.10            | I6N-CD1     |
| 6         | N    | 6         | CG1  | 2.76         | 0.10            | I6N-CG1     |
| 6         | N    | 6         | CG2  | 3.30         | 1.10            | I6N-CG2     |
| 6         | N    | 6         | CB   | 2.50         | 0.32            | I6N-CB      |
| 6         | N    | 6         | CD1  | 3.62         | 0.33            | I6N-CD1     |
| 6         | N    | 6         | CG2  | 3.97         | 0.30            | I6N-CG2     |
| 6         | N    | 15        | CD   | 5.76         | 0.10            | I6N-E15CD   |
| 6         | N    | 53        | CG2  | 3.54         | 1.10            | I6N-T53CG2  |
| 6         | N    | 53        | CG2  | 3.39         | 1.10            | I6N-T53CG2  |
| 6         | N    | 54        | CG1  | 5.89         | 2.02            | I6N-V54CG1  |
| 7         | N    | 6         | CA   | 2.21         | 0.10            | L7N-I6CA    |
| 7         | N    | 6         | CD1  | 4.74         | 3.74            | L7N-I6CD1   |
| 7         | N    | 6         | CG1  | 4.35         | 0.27            | L7N-I6CG1   |
| 7         | N    | 6         | CG2  | 3.04         | 0.10            | L7N-I6CG2   |
| 7         | N    | 6         | CB   | 3.50         | 0.10            | L7N-I6CB    |
| 7         | N    | 6         | CD1  | 4.55         | 3.55            | L7N-I6CD1   |
| 7         | N    | 6         | CG2  | 3.54         | 0.10            | L7N-I6CG2   |

| Residue i | Atom | Residue j | Atom | Distance (Å) | Uncertainty (Å) | Label        |
|-----------|------|-----------|------|--------------|-----------------|--------------|
| 7         | N    | 7         | CA   | 1.45         | 0.12            | L7N-CA       |
| 7         | N    | 7         | CD1  | 3.28         | 0.10            | L7N-CD1      |
| 7         | N    | 7         | CD2  | 3.50         | 1.10            | L7N-CD2      |
| 7         | N    | 7         | CB   | 2.45         | 0.34            | L7N-CB       |
| 7         | N    | 7         | CD1  | 3.48         | 1.10            | L7N-CD1      |
| 7         | N    | 7         | CD2  | 3.53         | 1.12            | L7N-CD2      |
| 7         | N    | 15        | CD   | 5.62         | 0.10            | L7N-E15CD    |
| 7         | N    | 54        | CG1  | 4.87         | 0.70            | L7N-V54CG1   |
| 8         | N    | 6         | CG2  | 4.67         | 0.24            | N8N-I6CG2    |
| 8         | ND2  | 6         | CG2  | 5.57         | 1.65            | N8ND2-I6CG2  |
| 8         | N    | 6         | CD1  | 7.30         | 3.14            | N8N-I6CD1    |
| 8         | N    | 7         | CA   | 2.56         | 0.10            | N8N-L7CA     |
| 8         | N    | 7         | CD1  | 4.79         | 3.79            | N8N-L7CD1    |
| 8         | N    | 7         | CD2  | 4.61         | 1.10            | N8N-L7CD2    |
| 8         | N    | 7         | CB   | 3.67         | 0.20            | N8N-L7CB     |
| 8         | N    | 8         | CA   | 1.50         | 0.10            | N8N-CA       |
| 8         | N    | 8         | CB   | 2.21         | 0.10            | N8N-CB       |
| 8         | ND2  | 8         | CB   | 2.71         | 0.47            | N8ND2-CB     |
| 8         | ND2  | 8         | CG   | 1.41         | 0.10            | N8ND2-CG     |
| 8         | N    | 8         | CA   | 1.50         | 0.10            | N8N-CA       |
| 8         | ND2  | 8         | CA   | 4.05         | 0.90            | N8ND2-CA     |
| 8         | ND2  | 8         | CG   | 1.43         | 0.10            | N8ND2-CG     |
| 8         | N    | 9         | CA   | 4.91         | 2.64            | N8N-G9CA     |
| 8         | N    | 55        | CB   | 5.28         | 4.28            | N8N-T55CB    |
| 8         | ND2  | 55        | CB   | 5.28         | 2.29            | N8ND2-T55CB  |
| 8         | ND2  | 55        | CG2  | 3.80         | 1.10            | N8ND2-T55CG2 |
| 8         | ND2  | 55        | CG2  | 4.39         | 3.39            | N8ND2-T55CG2 |
| 9         | N    | 6         | CG2  | 6.40         | 5.40            | G9N-I6CG2    |
| 9         | N    | 7         | CA   | 5.32         | 4.32            | G9N-L7CA     |
| 9         | N    | 7         | CD2  | 5.09         | 4.09            | G9N-L7CD2    |
| 9         | N    | 8         | CA   | 2.55         | 0.13            | G9N-N8CA     |
| 9         | N    | 8         | CA   | 2.46         | 0.17            | G9N-N8CA     |
| 9         | N    | 9         | CA   | 1.42         | 0.10            | G9N-CA       |
| 9         | N    | 9         | CA   | 1.44         | 0.10            | G9N-CA       |
| 9         | N    | 10        | CB   | 6.40         | 5.40            | G9N-K10CB    |
| 9         | N    | 12        | CD2  | 5.65         | 1.47            | G9N-L12CD2   |
| 9         | N    | 13        | CG   | 4.27         | 0.10            | G9N-K13CG    |
| 9         | N    | 13        | CE   | 3.65         | 0.38            | G9N-K13CE    |
| 9         | N    | 13        | CG   | 4.92         | 2.73            | G9N-K13CG    |
| 9         | N    | 39        | CG1  | 4.85         | 0.38            | G9N-V39CG1   |
| 9         | N    | 39        | CG1  | 5.67         | 0.10            | G9N-V39CG1   |
| 9         | N    | 54        | CG1  | 5.76         | 1.03            | G9N-V54CG1   |
| 9         | N    | 56        | CB   | 4.72         | 1.75            | G9N-E56CB    |
| 9         | N    | 56        | CD   | 4.89         | 1.06            | G9N-E56CD    |
| 9         | N    | 56        | CG   | 5.07         | 1.34            | G9N-E56CG    |
| 10        | N    | 9         | CA   | 2.48         | 0.10            | K10N-G9CA    |

| Residue i | Atom | Residue j | Atom | Distance (Å) | Uncertainty (Å) | Label       |
|-----------|------|-----------|------|--------------|-----------------|-------------|
| 10        | N    | 9         | CA   | 2.58         | 0.17            | K10N-G9CA   |
| 10        | N    | 10        | CB   | 2.44         | 0.10            | K10N-CB     |
| 10        | NZ   | 10        | CD   | 2.72         | 1.21            | K10NZ-CD    |
| 10        | NZ   | 10        | CE   | 1.92         | 0.92            | K10NZ-CE    |
| 10        | N    | 10        | CG   | 2.87         | 0.10            | K10N-CG     |
| 10        | NZ   | 10        | CG   | 3.89         | 0.10            | K10NZ-CG    |
| 10        | N    | 10        | CA   | 1.45         | 0.10            | K10N-CA     |
| 10        | N    | 10        | CB   | 2.38         | 0.10            | K10N-CB     |
| 10        | N    | 10        | CD   | 4.31         | 0.10            | K10N-CD     |
| 10        | NZ   | 10        | CD   | 3.52         | 1.27            | K10NZ-CD    |
| 10        | N    | 10        | CE   | 4.66         | 0.43            | K10N-CE     |
| 10        | NZ   | 10        | CE   | 1.58         | 0.10            | K10NZ-CE    |
| 10        | N    | 10        | CG   | 3.45         | 1.10            | K10N-CG     |
| 10        | N    | 13        | CE   | 4.19         | 0.67            | K10N-K13CE  |
| 10        | NZ   | 40        | CG   | 5.99         | 4.99            | K10NZ-D40CG |
| 10        | NZ   | 56        | CD   | 5.69         | 4.69            | K10NZ-E56CD |
| 10        | N    | 56        | CD   | 3.60         | 0.13            | K10N-E56CD  |
| 10        | N    | 56        | CG   | 3.86         | 0.16            | K10N-E56CG  |
| 11        | N    | 10        | CA   | 2.47         | 0.10            | T11N-K10CA  |
| 11        | N    | 10        | CB   | 3.31         | 0.10            | T11N-K10CB  |
| 11        | N    | 10        | CD   | 5.58         | 1.45            | T11N-K10CD  |
| 11        | N    | 10        | CG   | 4.25         | 0.20            | T11N-K10CG  |
| 11        | N    | 10        | CA   | 2.53         | 0.11            | T11N-K10CA  |
| 11        | N    | 10        | CB   | 3.37         | 0.10            | T11N-K10CB  |
| 11        | N    | 10        | CD   | 6.28         | 1.69            | T11N-K10CD  |
| 11        | N    | 10        | CG   | 4.72         | 3.72            | T11N-K10CG  |
| 11        | N    | 11        | CA   | 1.45         | 0.10            | T11N-CA     |
| 11        | N    | 11        | CB   | 2.54         | 0.10            | T11N-CB     |
| 11        | N    | 11        | CG2  | 2.80         | 0.12            | T11N-CG2    |
| 11        | N    | 11        | CA   | 1.43         | 0.43            | T11N-CA     |
| 11        | N    | 11        | CB   | 2.50         | 0.10            | T11N-CB     |
| 11        | N    | 11        | CG2  | 3.29         | 0.28            | T11N-CG2    |
| 11        | N    | 12        | CA   | 5.07         | 1.94            | T11N-L12CA  |
| 11        | N    | 13        | CE   | 4.36         | 0.67            | T11N-K13CE  |
| 11        | N    | 39        | CG1  | 6.80         | 0.38            | T11N-V39CG1 |
| 11        | N    | 56        | CD   | 5.45         | 0.99            | T11N-E56CD  |
| 12        | N    | 9         | CA   | 4.65         | 2.55            | L12N-G9CA   |
| 12        | N    | 10        | CG   | 5.88         | 1.12            | L12N-K10CG  |
| 12        | N    | 11        | CA   | 2.58         | 0.13            | L12N-T11CA  |
| 12        | N    | 11        | CB   | 3.58         | 2.58            | L12N-T11CB  |
| 12        | N    | 11        | CG2  | 4.38         | 0.40            | L12N-T11CG2 |
| 12        | N    | 11        | CA   | 2.56         | 0.10            | L12N-T11CA  |
| 12        | N    | 11        | CB   | 3.58         | 0.10            | L12N-T11CB  |
| 12        | N    | 11        | CG2  | 4.94         | 0.21            | L12N-T11CG2 |
| 12        | N    | 12        | CA   | 1.43         | 0.10            | L12N-CA     |
| 12        | N    | 12        | CD2  | 3.99         | 0.10            | L12N-CD2    |

| Residue i | Atom | Residue j | Atom | Distance (Å) | Uncertainty (Å) | Label       |
|-----------|------|-----------|------|--------------|-----------------|-------------|
| 12        | N    | 12        | CB   | 2.38         | 0.10            | L12N-CB     |
| 12        | N    | 12        | CD2  | 4.50         | 0.17            | L12N-CD2    |
| 12        | N    | 39        | CG1  | 6.09         | 0.39            | L12N-V39CG1 |
| 13        | N    | 7         | CD2  | 4.79         | 0.16            | K13N-L7CD2  |
| 13        | NZ   | 7         | CD2  | 6.73         | 0.16            | K13NZ-L7CD2 |
| 13        | N    | 9         | CA   | 5.64         | 4.64            | K13N-G9CA   |
| 13        | N    | 12        | CD2  | 3.44         | 0.43            | K13N-L12CD2 |
| 13        | N    | 12        | CG   | 3.08         | 1.10            | K13N-L12CG  |
| 13        | N    | 12        | CD2  | 3.43         | 1.10            | K13N-L12CD2 |
| 13        | N    | 13        | CA   | 1.46         | 0.10            | K13N-CA     |
| 13        | N    | 13        | CB   | 2.45         | 0.20            | K13N-CB     |
| 13        | N    | 13        | CD   | 4.35         | 1.10            | K13N-CD     |
| 13        | NZ   | 13        | CD   | 2.66         | 0.33            | K13NZ-CD    |
| 13        | NZ   | 13        | CE   | 2.26         | 1.10            | K13NZ-CE    |
| 13        | N    | 13        | CG   | 3.06         | 0.10            | K13N-CG     |
| 13        | NZ   | 13        | CG   | 4.10         | 3.10            | K13NZ-CG    |
| 13        | N    | 13        | CA   | 1.44         | 0.10            | K13N-CA     |
| 13        | N    | 13        | CB   | 2.41         | 0.36            | K13N-CB     |
| 13        | N    | 13        | CD   | 3.87         | 0.40            | K13N-CD     |
| 13        | NZ   | 13        | CD   | 2.91         | 1.10            | K13NZ-CD    |
| 13        | NZ   | 13        | CE   | 1.57         | 0.10            | K13NZ-CE    |
| 13        | N    | 13        | CG   | 3.22         | 0.10            | K13N-CG     |
| 13        | NZ   | 13        | CG   | 3.61         | 1.10            | K13NZ-CG    |
| 13        | NZ   | 56        | CD   | 7.18         | 6.18            | K13NZ-E56CD |
| 14        | N    | 6         | CD1  | 6.34         | 1.15            | G14N-I6CD1  |
| 14        | N    | 6         | CG2  | 5.46         | 1.46            | G14N-I6CG2  |
| 14        | N    | 6         | CD1  | 7.30         | 1.98            | G14N-I6CD1  |
| 14        | N    | 7         | CA   | 5.10         | 4.10            | G14N-L7CA   |
| 14        | N    | 7         | CD2  | 5.08         | 1.14            | G14N-L7CD2  |
| 14        | N    | 7         | CB   | 4.01         | 1.04            | G14N-L7CB   |
| 14        | N    | 12        | CD2  | 5.17         | 0.83            | G14N-L12CD2 |
| 14        | N    | 13        | CA   | 2.51         | 0.10            | G14N-K13CA  |
| 14        | N    | 13        | CB   | 3.37         | 0.10            | G14N-K13CB  |
| 14        | N    | 13        | CG   | 3.41         | 1.10            | G14N-K13CG  |
| 14        | N    | 13        | CA   | 2.58         | 0.14            | G14N-K13CA  |
| 14        | N    | 13        | CB   | 3.21         | 0.31            | G14N-K13CB  |
| 14        | N    | 13        | CG   | 4.60         | 0.10            | G14N-K13CG  |
| 14        | N    | 14        | CA   | 1.44         | 0.10            | G14N-CA     |
| 14        | N    | 14        | CA   | 1.43         | 0.10            | G14N-CA     |
| 15        | N    | 6         | CD1  | 5.67         | 0.16            | E15N-I6CD1  |
| 15        | N    | 6         | CG2  | 5.57         | 1.65            | E15N-I6CG2  |
| 15        | N    | 6         | CD1  | 5.91         | 1.03            | E15N-I6CD1  |
| 15        | N    | 7         | CD1  | 3.98         | 1.10            | E15N-L7CD1  |
| 15        | N    | 7         | CD2  | 4.76         | 1.10            | E15N-L7CD2  |
| 15        | N    | 7         | CD1  | 5.02         | 1.10            | E15N-L7CD1  |
| 15        | N    | 14        | CA   | 2.81         | 0.22            | E15N-G14CA  |

| Residue i | Atom | Residue j | Atom | Distance (Å) | Uncertainty (Å) | Label       |
|-----------|------|-----------|------|--------------|-----------------|-------------|
| 15        | N    | 14        | CA   | 2.62         | 0.14            | E15N-G14CA  |
| 15        | N    | 15        | CA   | 1.46         | 0.10            | E15N-CA     |
| 15        | N    | 15        | CB   | 2.95         | 0.59            | E15N-CB     |
| 15        | N    | 15        | CG   | 2.77         | 0.10            | E15N-CG     |
| 15        | N    | 15        | CA   | 1.44         | 0.10            | E15N-CA     |
| 15        | N    | 15        | CB   | 2.50         | 0.18            | E15N-CB     |
| 15        | N    | 15        | CD   | 3.71         | 0.10            | E15N-CD     |
| 15        | N    | 15        | CG   | 2.49         | 1.49            | E15N-CG     |
| 15        | N    | 16        | CG2  | 6.35         | 0.96            | E15N-T16CG2 |
| 16        | N    | 4         | CG   | 4.42         | 0.28            | T16N-K4CG   |
| 16        | N    | 5         | CD2  | 5.36         | 1.10            | T16N-L5CD2  |
| 16        | N    | 6         | CD1  | 5.74         | 0.16            | T16N-I6CD1  |
| 16        | N    | 6         | CG2  | 5.64         | 1.93            | T16N-I6CG2  |
| 16        | N    | 6         | CD1  | 5.91         | 1.03            | T16N-I6CD1  |
| 16        | N    | 7         | CD1  | 4.06         | 0.10            | T16N-L7CD1  |
| 16        | N    | 7         | CD1  | 4.31         | 0.10            | T16N-L7CD1  |
| 16        | N    | 15        | CA   | 2.62         | 0.15            | T16N-E15CA  |
| 16        | N    | 15        | CB   | 2.81         | 0.29            | T16N-E15CB  |
| 16        | N    | 15        | CG   | 3.22         | 1.11            | T16N-E15CG  |
| 16        | N    | 15        | CA   | 2.70         | 0.20            | T16N-E15CA  |
| 16        | N    | 15        | CD   | 4.24         | 3.24            | T16N-E15CD  |
| 16        | N    | 15        | CG   | 3.47         | 1.10            | T16N-E15CG  |
| 16        | N    | 16        | CG2  | 2.63         | 1.37            | T16N-CG2    |
| 16        | N    | 16        | CA   | 1.38         | 0.10            | T16N-CA     |
| 16        | N    | 16        | CB   | 2.43         | 0.13            | T16N-CB     |
| 16        | N    | 16        | CG2  | 3.53         | 0.23            | T16N-CG2    |
| 17        | N    | 16        | CB   | 3.24         | 0.10            | T17N-T16CB  |
| 17        | N    | 16        | CG2  | 3.90         | 0.10            | T17N-T16CG2 |
| 17        | N    | 17        | CB   | 2.52         | 0.17            | T17N-CB     |
| 17        | N    | 17        | CG2  | 2.56         | 1.21            | T17N-CG2    |
| 17        | N    | 17        | CB   | 2.15         | 0.56            | T17N-CB     |
| 17        | N    | 17        | CG2  | 3.17         | 1.10            | T17N-CG2    |
| 18        | N    | 2         | CD   | 6.62         | 5.62            | T18N-Q2CD   |
| 18        | N    | 3         | CA   | 5.03         | 4.03            | T18N-Y3CA   |
| 18        | N    | 3         | CG   | 5.56         | 1.21            | T18N-Y3CG   |
| 18        | N    | 18        | CA   | 1.43         | 0.10            | T18N-CA     |
| 18        | N    | 18        | CB   | 2.47         | 1.47            | T18N-CB     |
| 18        | N    | 18        | CG2  | 2.81         | 0.10            | T18N-CG2    |
| 18        | N    | 18        | CA   | 1.44         | 0.10            | T18N-CA     |
| 18        | N    | 18        | CB   | 2.46         | 0.10            | T18N-CB     |
| 18        | N    | 18        | CG2  | 3.30         | 0.10            | T18N-CG2    |
| 18        | N    | 19        | CD   | 6.86         | 0.35            | T18N-E19CD  |
| 19        | N    | 17        | CG2  | 5.45         | 0.10            | E19N-T17CG2 |
| 19        | N    | 18        | CA   | 2.64         | 0.15            | E19N-T18CA  |
| 19        | N    | 18        | CB   | 3.30         | 0.10            | E19N-T18CB  |
| 19        | N    | 18        | CG2  | 3.07         | 1.10            | E19N-T18CG2 |

| Residue i | Atom | Residue j | Atom | Distance (Å) | Uncertainty (Å) | Label       |
|-----------|------|-----------|------|--------------|-----------------|-------------|
| 19        | N    | 18        | CA   | 2.58         | 0.15            | E19N-T18CA  |
| 19        | N    | 18        | CB   | 3.26         | 0.10            | E19N-T18CB  |
| 19        | N    | 18        | CG2  | 3.63         | 0.10            | E19N-T18CG2 |
| 19        | N    | 19        | CA   | 1.47         | 0.10            | E19N-CA     |
| 19        | N    | 19        | CA   | 1.53         | 0.10            | E19N-CA     |
| 19        | N    | 19        | CD   | 3.60         | 1.10            | E19N-CD     |
| 20        | N    | 20        | CB   | 2.46         | 0.10            | A20N-CB     |
| 20        | N    | 20        | CA   | 1.44         | 0.10            | A20N-CA     |
| 20        | N    | 20        | CB   | 2.41         | 0.20            | A20N-CB     |
| 21        | N    | 1         | CE   | 5.00         | 0.10            | V21N-M1CE   |
| 21        | N    | 1         | CG   | 5.88         | 4.88            | V21N-M1CG   |
| 21        | N    | 20        | CA   | 2.10         | 0.13            | V21N-A20CA  |
| 21        | N    | 20        | CB   | 3.27         | 0.10            | V21N-A20CB  |
| 21        | N    | 20        | CA   | 2.70         | 0.10            | V21N-A20CA  |
| 21        | N    | 20        | CB   | 3.25         | 0.10            | V21N-A20CB  |
| 21        | N    | 21        | CG1  | 2.61         | 1.19            | V21N-CG1    |
| 21        | N    | 21        | CG2  | 2.81         | 1.32            | V21N-CG2    |
| 21        | N    | 21        | CB   | 2.43         | 0.10            | V21N-CB     |
| 21        | N    | 22        | CA   | 3.82         | 0.89            | V21N-D22CA  |
| 21        | N    | 25        | CG2  | 4.38         | 0.10            | V21N-T25CG2 |
| 22        | N    | 1         | CE   | 5.35         | 0.84            | D22N-M1CE   |
| 22        | N    | 20        | CA   | 4.68         | 2.37            | D22N-A20CA  |
| 22        | N    | 20        | CB   | 3.92         | 0.10            | D22N-A20CB  |
| 22        | N    | 21        | CG1  | 2.93         | 0.16            | D22N-V21CG1 |
| 22        | N    | 21        | CG2  | 3.02         | 0.29            | D22N-V21CG2 |
| 22        | N    | 22        | CA   | 1.46         | 0.10            | D22N-CA     |
| 22        | N    | 22        | CB   | 2.52         | 0.10            | D22N-CB     |
| 22        | N    | 22        | CA   | 1.44         | 0.10            | D22N-CA     |
| 22        | N    | 22        | CB   | 2.44         | 0.13            | D22N-CB     |
| 22        | N    | 25        | CG2  | 4.41         | 3.41            | D22N-T25CG2 |
| 23        | N    | 1         | CE   | 4.20         | 1.04            | A23N-M1CE   |
| 23        | N    | 22        | CA   | 2.60         | 0.18            | A23N-D22CA  |
| 23        | N    | 22        | CB   | 2.93         | 0.10            | A23N-D22CB  |
| 23        | N    | 22        | CA   | 2.50         | 0.16            | A23N-D22CA  |
| 23        | N    | 22        | CB   | 3.21         | 0.10            | A23N-D22CB  |
| 23        | N    | 23        | CB   | 2.49         | 0.15            | A23N-CB     |
| 23        | N    | 23        | CA   | 1.44         | 0.10            | A23N-CA     |
| 23        | N    | 23        | CB   | 2.34         | 0.10            | A23N-CB     |
| 23        | N    | 26        | CB   | 6.01         | 2.10            | A23N-A26CB  |
| 24        | N    | 24        | CA   | 1.51         | 0.10            | A24N-CA     |
| 24        | N    | 24        | CB   | 2.75         | 0.23            | A24N-CB     |
| 24        | N    | 24        | CA   | 1.53         | 0.10            | A24N-CA     |
| 24        | N    | 24        | CB   | 2.35         | 0.10            | A24N-CB     |
| 24        | N    | 25        | CA   | 4.68         | 1.60            | A24N-T25CA  |
| 25        | N    | 24        | CA   | 2.90         | 0.20            | T25N-A24CA  |
| 25        | N    | 24        | CB   | 3.82         | 1.10            | T25N-A24CB  |

| Residue i | Atom | Residue j | Atom | Distance (Å) | Uncertainty (Å) | Label        |
|-----------|------|-----------|------|--------------|-----------------|--------------|
| 25        | N    | 24        | CA   | 2.80         | 0.10            | T25N-A24CA   |
| 25        | N    | 24        | CB   | 3.39         | 0.10            | T25N-A24CB   |
| 25        | N    | 25        | CA   | 1.44         | 0.10            | T25N-CA      |
| 25        | N    | 25        | CB   | 2.50         | 0.20            | T25N-CB      |
| 25        | N    | 25        | CG2  | 2.72         | 1.10            | T25N-CG2     |
| 25        | N    | 25        | CA   | 1.49         | 0.10            | T25N-CA      |
| 25        | N    | 25        | CB   | 2.44         | 0.15            | T25N-CB      |
| 25        | N    | 25        | CG2  | 3.51         | 0.10            | T25N-CG2     |
| 25        | N    | 26        | CA   | 4.24         | 1.13            | T25N-A26CA   |
| 26        | N    | 20        | CB   | 4.43         | 0.10            | A26N-A20CB   |
| 26        | N    | 20        | CB   | 4.08         | 0.45            | A26N-A20CB   |
| 26        | N    | 25        | CA   | 2.73         | 0.21            | A26N-T25CA   |
| 26        | N    | 25        | CB   | 3.15         | 0.37            | A26N-T25CB   |
| 26        | N    | 25        | CA   | 2.53         | 0.15            | A26N-T25CA   |
| 26        | N    | 25        | CB   | 3.48         | 0.43            | A26N-T25CB   |
| 26        | N    | 26        | CB   | 2.46         | 0.10            | A26N-CB      |
| 26        | N    | 26        | CA   | 1.45         | 0.10            | A26N-CA      |
| 26        | N    | 26        | CB   | 2.42         | 0.13            | A26N-CB      |
| 26        | N    | 27        | CG   | 5.36         | 0.10            | A26N-E27CG   |
| 26        | N    | 27        | CD   | 6.21         | 0.10            | A26N-E27CD   |
| 27        | N    | 26        | CB   | 3.34         | 0.10            | E27N-A26CB   |
| 27        | N    | 26        | CA   | 2.51         | 0.16            | E27N-A26CA   |
| 27        | N    | 26        | CB   | 3.36         | 0.31            | E27N-A26CB   |
| 27        | N    | 27        | CA   | 1.48         | 0.10            | E27N-CA      |
| 27        | N    | 27        | CB   | 2.42         | 0.15            | E27N-CB      |
| 27        | N    | 27        | CG   | 3.30         | 0.10            | E27N-CG      |
| 27        | N    | 27        | CA   | 1.44         | 0.10            | E27N-CA      |
| 27        | N    | 27        | CB   | 2.42         | 0.11            | E27N-CB      |
| 27        | N    | 27        | CD   | 4.94         | 0.10            | E27N-CD      |
| 27        | N    | 28        | CD   | 5.96         | 1.11            | E27N-K28CD   |
| 27        | N    | 28        | CE   | 6.61         | 5.61            | E27N-K28CE   |
| 27        | N    | 29        | CG2  | 5.39         | 2.05            | E27N-V29CG2  |
| 27        | N    | 30        | CG   | 4.82         | 0.34            | E27N-F30CG   |
| 28        | NZ   | 24        | CB   | 6.94         | 5.94            | K28NZ-A24CB  |
| 28        | NZ   | 25        | CG2  | 6.07         | 0.10            | K28NZ-T25CG2 |
| 28        | N    | 26        | CB   | 5.74         | 4.74            | K28N-A26CB   |
| 28        | N    | 26        | CB   | 5.28         | 0.98            | K28N-A26CB   |
| 28        | N    | 27        | CA   | 2.53         | 0.13            | K28N-E27CA   |
| 28        | N    | 27        | CB   | 2.99         | 0.26            | K28N-E27CB   |
| 28        | N    | 27        | CG   | 3.28         | 0.11            | K28N-E27CG   |
| 28        | N    | 27        | CA   | 2.49         | 0.10            | K28N-E27CA   |
| 28        | N    | 27        | CB   | 3.20         | 0.10            | K28N-E27CB   |
| 28        | N    | 27        | CD   | 4.25         | 0.10            | K28N-E27CD   |
| 28        | N    | 28        | CA   | 1.47         | 0.10            | K28N-CA      |
| 28        | N    | 28        | CB   | 2.43         | 0.10            | K28N-CB      |
| 28        | N    | 28        | CD   | 4.32         | 0.29            | K28N-CD      |



| Residue i | Atom | Residue j | Atom | Distance (Å) | Uncertainty (Å) | Label       |
|-----------|------|-----------|------|--------------|-----------------|-------------|
| 28        | NZ   | 28        | CD   | 2.88         | 0.10            | K28NZ-CD    |
| 28        | N    | 28        | CE   | 5.45         | 1.95            | K28N-CE     |
| 28        | NZ   | 28        | CE   | 1.88         | 0.10            | K28NZ-CE    |
| 28        | N    | 28        | CG   | 2.67         | 0.22            | K28N-CG     |
| 28        | N    | 28        | CA   | 1.44         | 0.10            | K28N-CA     |
| 28        | N    | 28        | CB   | 2.41         | 0.10            | K28N-CB     |
| 28        | N    | 28        | CD   | 4.58         | 0.10            | K28N-CD     |
| 28        | NZ   | 28        | CD   | 3.29         | 1.10            | K28NZ-CD    |
| 28        | N    | 28        | CE   | 5.95         | 2.09            | K28N-CE     |
| 28        | NZ   | 28        | CE   | 1.87         | 0.10            | K28NZ-CE    |
| 28        | N    | 28        | CG   | 3.14         | 0.28            | K28N-CG     |
| 28        | NZ   | 28        | CG   | 4.19         | 0.28            | K28NZ-CG    |
| 28        | N    | 29        | CG1  | 4.67         | 1.74            | K28N-V29CG1 |
| 28        | N    | 29        | CG2  | 5.28         | 1.86            | K28N-V29CG2 |
| 29        | N    | 28        | CA   | 2.29         | 0.10            | V29N-K28CA  |
| 29        | N    | 28        | CB   | 3.17         | 0.12            | V29N-K28CB  |
| 29        | N    | 28        | CD   | 6.84         | 2.84            | V29N-K28CD  |
| 29        | N    | 28        | CA   | 2.39         | 0.10            | V29N-K28CA  |
| 29        | N    | 28        | CB   | 3.15         | 0.14            | V29N-K28CB  |
| 29        | N    | 28        | CG   | 4.41         | 0.30            | V29N-K28CG  |
| 29        | N    | 29        | CA   | 1.49         | 0.10            | V29N-CA     |
| 29        | N    | 29        | CG1  | 2.96         | 1.10            | V29N-CG1    |
| 29        | N    | 29        | CG2  | 2.69         | 0.10            | V29N-CG2    |
| 29        | N    | 29        | CG2  | 2.75         | 0.50            | V29N-CG2    |
| 30        | N    | 29        | CG1  | 2.81         | 1.10            | F30N-V29CG1 |
| 30        | N    | 29        | CG2  | 4.29         | 0.26            | F30N-V29CG2 |
| 30        | N    | 29        | CG1  | 3.57         | 0.24            | F30N-V29CG1 |
| 30        | N    | 30        | CB   | 2.47         | 0.10            | F30N-CB     |
| 30        | N    | 30        | CA   | 1.45         | 0.10            | F30N-CA     |
| 30        | N    | 30        | CG   | 2.99         | 0.10            | F30N-CG     |
| 30        | N    | 33        | CB   | 3.82         | 0.28            | F30N-Y33CB  |
| 31        | NZ   | 27        | CG   | 3.67         | 1.10            | K31NZ-E27CG |
| 31        | N    | 27        | CG   | 4.19         | 1.10            | K31N-E27CG  |
| 31        | NZ   | 27        | CD   | 4.00         | 0.10            | K31NZ-E27CD |
| 31        | N    | 30        | CB   | 3.06         | 0.10            | K31N-F30CB  |
| 31        | N    | 30        | CA   | 2.56         | 0.10            | K31N-F30CA  |
| 31        | N    | 30        | CG   | 4.42         | 0.10            | K31N-F30CG  |
| 31        | N    | 31        | CA   | 1.47         | 0.10            | K31N-CA     |
| 31        | N    | 31        | CB   | 2.62         | 0.10            | K31N-CB     |
| 31        | NZ   | 31        | CD   | 2.52         | 0.15            | K31NZ-CD    |
| 31        | NZ   | 31        | CE   | 1.61         | 0.10            | K31NZ-CE    |
| 31        | N    | 31        | CG   | 2.43         | 1.16            | K31N-CG     |
| 31        | N    | 31        | CA   | 1.45         | 0.10            | K31N-CA     |
| 31        | N    | 31        | CB   | 2.35         | 0.10            | K31N-CB     |
| 31        | NZ   | 31        | CD   | 2.32         | 0.10            | K31NZ-CD    |
| 31        | NZ   | 31        | CE   | 1.90         | 0.90            | K31NZ-CE    |

| Residue i | Atom | Residue j | Atom | Distance (Å) | Uncertainty (Å) | Label        |
|-----------|------|-----------|------|--------------|-----------------|--------------|
| 31        | N    | 31        | CG   | 2.92         | 1.92            | K31N-CG      |
| 31        | NZ   | 31        | CG   | 3.76         | 0.10            | K31NZ-CG     |
| 31        | NZ   | 43        | CD2  | 5.28         | 1.38            | K31NZ-W43CD2 |
| 31        | N    | 43        | CZ2  | 4.49         | 0.25            | K31N-W43CZ2  |
| 31        | N    | 43        | CZ3  | 4.53         | 0.10            | K31N-W43CZ3  |
| 31        | NZ   | 43        | CZ3  | 6.38         | 0.10            | K31NZ-W43CZ3 |
| 32        | N    | 31        | CB   | 3.12         | 0.10            | Q32N-K31CB   |
| 32        | N    | 31        | CA   | 2.53         | 0.12            | Q32N-K31CA   |
| 32        | N    | 32        | CA   | 1.42         | 0.10            | Q32N-CA      |
| 32        | NE2  | 32        | CB   | 2.43         | 1.10            | Q32NE2-CB    |
| 32        | NE2  | 32        | CD   | 1.70         | 0.10            | Q32NE2-CD    |
| 32        | NE2  | 32        | CG   | 2.59         | 0.12            | Q32NE2-CG    |
| 32        | N    | 32        | CA   | 1.47         | 0.10            | Q32N-CA      |
| 32        | N    | 32        | CB   | 2.24         | 0.12            | Q32N-CB      |
| 32        | NE2  | 32        | CB   | 3.91         | 0.37            | Q32NE2-CB    |
| 32        | N    | 54        | CG1  | 6.30         | 5.30            | Q32N-V54CG1  |
| 33        | N    | 33        | CB   | 2.47         | 0.34            | Y33N-CB      |
| 33        | N    | 33        | CA   | 1.44         | 0.10            | Y33N-CA      |
| 33        | N    | 33        | CG   | 3.47         | 0.10            | Y33N-CG      |
| 34        | N    | 30        | CG   | 5.86         | 1.46            | A34N-F30CG   |
| 34        | N    | 33        | CB   | 3.44         | 0.64            | A34N-Y33CB   |
| 34        | N    | 33        | CA   | 2.39         | 0.15            | A34N-Y33CA   |
| 34        | N    | 33        | CG   | 3.35         | 0.10            | A34N-Y33CG   |
| 34        | N    | 34        | CA   | 1.51         | 0.10            | A34N-CA      |
| 34        | N    | 34        | CB   | 2.44         | 0.10            | A34N-CB      |
| 34        | N    | 34        | CA   | 1.46         | 0.10            | A34N-CA      |
| 34        | N    | 34        | CB   | 2.42         | 0.10            | A34N-CB      |
| 34        | N    | 35        | CA   | 3.57         | 0.58            | A34N-N35CA   |
| 34        | N    | 54        | CG1  | 6.17         | 5.17            | A34N-V54CG1  |
| 35        | N    | 34        | CA   | 2.81         | 0.10            | N35N-A34CA   |
| 35        | N    | 34        | CB   | 3.29         | 0.10            | N35N-A34CB   |
| 35        | N    | 34        | CA   | 2.50         | 0.12            | N35N-A34CA   |
| 35        | N    | 34        | CB   | 3.32         | 0.10            | N35N-A34CB   |
| 35        | N    | 35        | CA   | 1.47         | 0.10            | N35N-CA      |
| 35        | N    | 35        | CB   | 2.47         | 0.16            | N35N-CB      |
| 35        | ND2  | 35        | CB   | 3.54         | 1.27            | N35ND2-CB    |
| 35        | N    | 35        | CG   | 3.53         | 0.10            | N35N-CG      |
| 35        | ND2  | 35        | CG   | 1.87         | 0.87            | N35ND2-CG    |
| 35        | N    | 35        | CA   | 1.41         | 0.10            | N35N-CA      |
| 35        | N    | 35        | CB   | 2.42         | 0.10            | N35N-CB      |
| 35        | ND2  | 35        | CB   | 3.74         | 1.10            | N35ND2-CB    |
| 35        | ND2  | 35        | CG   | 1.88         | 0.88            | N35ND2-CG    |
| 36        | N    | 35        | CA   | 2.59         | 0.15            | D36N-N35CA   |
| 36        | N    | 35        | CB   | 3.02         | 0.10            | D36N-N35CB   |
| 36        | N    | 35        | CA   | 2.60         | 0.10            | D36N-N35CA   |
| 36        | N    | 35        | CB   | 3.15         | 0.13            | D36N-N35CB   |

| Residue i | Atom | Residue j | Atom | Distance (Å) | Uncertainty (Å) | Label         |
|-----------|------|-----------|------|--------------|-----------------|---------------|
| 36        | N    | 36        | CA   | 1.45         | 0.10            | D36N-CA       |
| 36        | N    | 36        | CB   | 2.41         | 0.10            | D36N-CB       |
| 36        | N    | 36        | CA   | 1.44         | 0.10            | D36N-CA       |
| 36        | N    | 36        | CB   | 2.44         | 0.10            | D36N-CB       |
| 36        | N    | 36        | CG   | 2.56         | 0.10            | D36N-CG       |
| 36        | N    | 37        | CG   | 5.05         | 2.33            | D36N-N37CG    |
| 37        | ND2  | 12        | CD1  | 3.06         | 0.10            | N37ND2-L12CD1 |
| 37        | ND2  | 12        | CD2  | 5.68         | 1.54            | N37ND2-L12CD2 |
| 37        | N    | 33        | CG   | 5.27         | 0.11            | N37N-Y33CG    |
| 37        | ND2  | 33        | CG   | 3.86         | 1.10            | N37ND2-Y33CG  |
| 37        | N    | 36        | CA   | 2.94         | 1.18            | N37N-D36CA    |
| 37        | N    | 36        | CB   | 3.38         | 0.30            | N37N-D36CB    |
| 37        | ND2  | 36        | CB   | 5.05         | 1.82            | N37ND2-D36CB  |
| 37        | N    | 36        | CA   | 2.51         | 0.18            | N37N-D36CA    |
| 37        | N    | 36        | CB   | 3.46         | 0.10            | N37N-D36CB    |
| 37        | N    | 37        | CA   | 1.48         | 0.10            | N37N-CA       |
| 37        | N    | 37        | CB   | 2.39         | 0.25            | N37N-CB       |
| 37        | ND2  | 37        | CB   | 2.63         | 1.63            | N37ND2-CB     |
| 37        | ND2  | 37        | CG   | 1.42         | 0.10            | N37ND2-CG     |
| 37        | N    | 37        | CA   | 1.48         | 0.10            | N37N-CA       |
| 37        | ND2  | 37        | CA   | 4.29         | 1.20            | N37ND2-CA     |
| 37        | N    | 37        | CB   | 2.27         | 0.10            | N37N-CB       |
| 37        | ND2  | 37        | CB   | 2.58         | 0.11            | N37ND2-CB     |
| 37        | N    | 37        | CG   | 2.40         | 1.21            | N37N-CG       |
| 37        | ND2  | 37        | CG   | 1.51         | 0.10            | N37ND2-CG     |
| 37        | N    | 38        | CA   | 4.36         | 1.53            | N37N-G38CA    |
| 37        | N    | 39        | CG1  | 5.64         | 0.39            | N37N-V39CG1   |
| 38        | N    | 12        | CD1  | 4.31         | 0.10            | G38N-L12CD1   |
| 38        | N    | 37        | CA   | 2.74         | 0.18            | G38N-N37CA    |
| 38        | N    | 37        | CB   | 3.70         | 2.70            | G38N-N37CB    |
| 38        | N    | 37        | CA   | 2.59         | 0.21            | G38N-N37CA    |
| 38        | N    | 37        | CB   | 3.88         | 1.10            | G38N-N37CB    |
| 38        | N    | 38        | CA   | 1.49         | 0.10            | G38N-CA       |
| 38        | N    | 38        | CA   | 1.43         | 0.10            | G38N-CA       |
| 39        | N    | 34        | CB   | 4.46         | 0.86            | V39N-A34CB    |
| 39        | N    | 37        | CG   | 6.32         | 4.88            | V39N-N37CG    |
| 39        | N    | 38        | CA   | 2.53         | 0.12            | V39N-G38CA    |
| 39        | N    | 38        | CA   | 2.60         | 0.10            | V39N-G38CA    |
| 39        | N    | 39        | CA   | 1.43         | 0.10            | V39N-CA       |
| 39        | N    | 39        | CG1  | 2.81         | 0.10            | V39N-CG1      |
| 39        | N    | 39        | CG1  | 3.11         | 0.34            | V39N-CG1      |
| 39        | N    | 40        | CG   | 6.60         | 0.16            | V39N-D40CG    |
| 39        | N    | 56        | CD   | 4.83         | 0.74            | V39N-E56CD    |
| 40        | N    | 10        | CE   | 5.48         | 1.21            | D40N-K10CE    |
| 40        | N    | 39        | CA   | 2.35         | 0.11            | D40N-V39CA    |
| 40        | N    | 39        | CG1  | 3.26         | 2.26            | D40N-V39CG1   |

| Residue i | Atom | Residue j | Atom | Distance (Å) | Uncertainty (Å) | Label         |
|-----------|------|-----------|------|--------------|-----------------|---------------|
| 40        | N    | 39        | CG1  | 3.81         | 1.10            | D40N-V39CG1   |
| 40        | N    | 40        | CA   | 1.50         | 0.10            | D40N-CA       |
| 40        | N    | 40        | CB   | 2.51         | 0.10            | D40N-CB       |
| 40        | N    | 40        | CG   | 2.82         | 1.10            | D40N-CG       |
| 40        | N    | 40        | CA   | 1.48         | 0.10            | D40N-CA       |
| 40        | N    | 40        | CB   | 2.46         | 0.18            | D40N-CB       |
| 40        | N    | 40        | CG   | 4.51         | 1.32            | D40N-CG       |
| 40        | N    | 41        | CA   | 4.34         | 1.10            | D40N-G41CA    |
| 40        | N    | 56        | CD   | 3.42         | 0.20            | D40N-E56CD    |
| 41        | N    | 34        | CB   | 5.30         | 1.79            | G41N-A34CB    |
| 41        | N    | 40        | CA   | 2.62         | 0.10            | G41N-D40CA    |
| 41        | N    | 40        | CB   | 3.60         | 0.17            | G41N-D40CB    |
| 41        | N    | 40        | CG   | 3.57         | 0.10            | G41N-D40CG    |
| 41        | N    | 40        | CA   | 2.59         | 0.10            | G41N-D40CA    |
| 41        | N    | 40        | CB   | 3.64         | 0.46            | G41N-D40CB    |
| 41        | N    | 40        | CG   | 4.23         | 0.15            | G41N-D40CG    |
| 41        | N    | 41        | CA   | 1.46         | 0.10            | G41N-CA       |
| 41        | N    | 41        | CA   | 1.47         | 0.10            | G41N-CA       |
| 41        | N    | 54        | CG1  | 6.13         | 2.85            | G41N-V54CG1   |
| 41        | N    | 54        | CG2  | 3.05         | 0.10            | G41N-V54CG2   |
| 41        | N    | 54        | CG2  | 2.93         | 0.10            | G41N-V54CG2   |
| 41        | N    | 56        | CB   | 4.24         | 0.20            | G41N-E56CB    |
| 41        | N    | 56        | CD   | 4.50         | 0.30            | G41N-E56CD    |
| 41        | N    | 56        | CG   | 5.41         | 1.40            | G41N-E56CG    |
| 42        | N    | 41        | CA   | 2.68         | 0.14            | E42N-G41CA    |
| 42        | N    | 41        | CA   | 2.63         | 0.10            | E42N-G41CA    |
| 42        | N    | 42        | CA   | 1.42         | 0.10            | E42N-CA       |
| 42        | N    | 42        | CG   | 2.56         | 0.12            | E42N-CG       |
| 42        | N    | 42        | CA   | 1.06         | 0.06            | E42N-CA       |
| 42        | N    | 42        | CB   | 2.51         | 0.14            | E42N-CB       |
| 43        | NE1  | 31        | CG   | 4.40         | 0.10            | W43NE1-K31CG  |
| 43        | NE1  | 34        | CB   | 5.90         | 3.20            | W43NE1-A34CB  |
| 43        | N    | 42        | CA   | 2.61         | 0.20            | W43N-E42CA    |
| 43        | N    | 42        | CB   | 3.41         | 0.29            | W43N-E42CB    |
| 43        | N    | 43        | CA   | 1.43         | 0.10            | W43N-CA       |
| 43        | N    | 43        | CD1  | 3.70         | 0.39            | W43N-CD1      |
| 43        | NE1  | 43        | CD1  | 1.46         | 0.10            | W43NE1-CD1    |
| 43        | N    | 43        | CD2  | 5.02         | 3.05            | W43N-CD2      |
| 43        | NE1  | 43        | CD2  | 2.26         | 0.10            | W43NE1-CD2    |
| 43        | NE1  | 43        | CZ2  | 2.52         | 0.17            | W43NE1-CZ2    |
| 43        | NE1  | 43        | CZ3  | 4.10         | 0.10            | W43NE1-CZ3    |
| 43        | N    | 43        | CZ3  | 6.02         | 0.10            | W43N-CZ3      |
| 43        | N    | 44        | CG2  | 5.42         | 4.42            | W43N-T44CG2   |
| 43        | NE1  | 54        | CG1  | 5.00         | 0.85            | W43NE1-V54CG1 |
| 43        | NE1  | 54        | CG2  | 3.21         | 0.10            | W43NE1-V54CG2 |
| 43        | N    | 54        | CG2  | 4.94         | 0.10            | W43N-V54CG2   |

| Residue i | Atom | Residue j | Atom | Distance (Å) | Uncertainty (Å) | Label       |
|-----------|------|-----------|------|--------------|-----------------|-------------|
| 43        | N    | 55        | CG2  | 5.72         | 0.10            | W43N-T55CG2 |
| 44        | N    | 43        | CB   | 2.81         | 0.10            | T44N-W43CB  |
| 44        | N    | 43        | CZ3  | 6.04         | 0.10            | T44N-W43CZ3 |
| 44        | N    | 44        | CA   | 1.45         | 0.10            | T44N-CA     |
| 44        | N    | 44        | CB   | 2.47         | 0.38            | T44N-CB     |
| 44        | N    | 44        | CG2  | 2.71         | 0.11            | T44N-CG2    |
| 44        | N    | 44        | CA   | 1.43         | 0.10            | T44N-CA     |
| 44        | N    | 44        | CB   | 2.45         | 0.10            | T44N-CB     |
| 44        | N    | 44        | CG2  | 3.01         | 0.96            | T44N-CG2    |
| 45        | N    | 44        | CA   | 2.58         | 1.58            | Y45N-T44CA  |
| 45        | N    | 44        | CB   | 3.22         | 0.10            | Y45N-T44CB  |
| 45        | N    | 44        | CA   | 2.59         | 0.10            | Y45N-T44CA  |
| 45        | N    | 44        | CB   | 3.31         | 0.10            | Y45N-T44CB  |
| 45        | N    | 45        | CB   | 2.35         | 0.10            | Y45N-CB     |
| 45        | N    | 45        | CA   | 1.44         | 0.10            | Y45N-CA     |
| 45        | N    | 45        | CG   | 3.67         | 0.29            | Y45N-CG     |
| 45        | N    | 52        | CG   | 5.72         | 1.15            | Y45N-F52CG  |
| 46        | N    | 45        | CA   | 2.56         | 0.14            | D46N-Y45CA  |
| 46        | N    | 45        | CG   | 3.27         | 0.10            | D46N-Y45CG  |
| 46        | N    | 46        | CA   | 1.44         | 0.10            | D46N-CA     |
| 46        | N    | 46        | CB   | 2.46         | 0.10            | D46N-CB     |
| 46        | N    | 46        | CA   | 1.45         | 0.10            | D46N-CA     |
| 46        | N    | 46        | CB   | 2.48         | 0.22            | D46N-CB     |
| 46        | N    | 46        | CG   | 3.53         | 0.19            | D46N-CG     |
| 46        | N    | 51        | CB   | 4.89         | 1.00            | D46N-T51CB  |
| 46        | N    | 51        | CB   | 5.28         | 3.00            | D46N-T51CB  |
| 46        | N    | 52        | CG   | 5.25         | 1.11            | D46N-F52CG  |
| 47        | N    | 45        | CA   | 5.95         | 4.95            | D47N-Y45CA  |
| 47        | N    | 45        | CG   | 4.19         | 0.10            | D47N-Y45CG  |
| 47        | N    | 46        | CA   | 2.76         | 0.19            | D47N-D46CA  |
| 47        | N    | 46        | CA   | 2.61         | 0.10            | D47N-D46CA  |
| 47        | N    | 46        | CB   | 3.90         | 0.10            | D47N-D46CB  |
| 47        | N    | 46        | CG   | 3.24         | 0.10            | D47N-D46CG  |
| 47        | N    | 47        | CA   | 1.51         | 0.10            | D47N-CA     |
| 47        | N    | 47        | CB   | 2.46         | 0.38            | D47N-CB     |
| 47        | N    | 47        | CA   | 1.41         | 0.10            | D47N-CA     |
| 47        | N    | 47        | CB   | 3.00         | 1.17            | D47N-CB     |
| 47        | N    | 47        | CG   | 3.76         | 0.51            | D47N-CG     |
| 47        | N    | 48        | CB   | 5.36         | 1.05            | D47N-A48CB  |
| 47        | N    | 48        | CA   | 4.22         | 1.45            | D47N-A48CA  |
| 48        | N    | 46        | CA   | 4.20         | 0.98            | A48N-D46CA  |
| 48        | N    | 46        | CG   | 3.42         | 0.10            | A48N-D46CG  |
| 48        | N    | 47        | CA   | 3.48         | 1.65            | A48N-D47CA  |
| 48        | N    | 47        | CB   | 3.70         | 0.50            | A48N-D47CB  |
| 48        | N    | 47        | CA   | 2.82         | 0.41            | A48N-D47CA  |
| 48        | N    | 47        | CB   | 4.32         | 1.18            | A48N-D47CB  |

| Residue i | Atom | Residue j | Atom | Distance (Å) | Uncertainty (Å) | Label       |
|-----------|------|-----------|------|--------------|-----------------|-------------|
| 48        | N    | 48        | CA   | 1.50         | 0.10            | A48N-CA     |
| 48        | N    | 48        | CB   | 2.50         | 0.10            | A48N-CB     |
| 48        | N    | 48        | CA   | 1.46         | 0.10            | A48N-CA     |
| 48        | N    | 48        | CB   | 2.45         | 0.10            | A48N-CB     |
| 48        | N    | 49        | CG2  | 5.29         | 0.38            | A48N-T49CG2 |
| 49        | N    | 46        | CG   | 3.67         | 0.10            | T49N-D46CG  |
| 49        | N    | 47        | CA   | 5.95         | 4.95            | T49N-D47CA  |
| 49        | N    | 48        | CA   | 2.81         | 0.18            | T49N-A48CA  |
| 49        | N    | 48        | CB   | 3.39         | 0.20            | T49N-A48CB  |
| 49        | N    | 48        | CA   | 2.49         | 0.10            | T49N-A48CA  |
| 49        | N    | 48        | CB   | 3.38         | 0.10            | T49N-A48CB  |
| 49        | N    | 49        | CB   | 2.50         | 0.28            | T49N-CB     |
| 49        | N    | 49        | CG2  | 2.88         | 0.25            | T49N-CG2    |
| 49        | N    | 49        | CA   | 1.44         | 0.10            | T49N-CA     |
| 49        | N    | 49        | CB   | 2.45         | 0.10            | T49N-CB     |
| 49        | N    | 49        | CG2  | 3.38         | 0.10            | T49N-CG2    |
| 49        | N    | 50        | CB   | 5.28         | 1.57            | T49N-K50CB  |
| 49        | N    | 50        | CD   | 6.06         | 5.06            | T49N-K50CD  |
| 49        | N    | 50        | CA   | 4.95         | 1.30            | T49N-K50CA  |
| 49        | N    | 50        | CG   | 4.88         | 0.90            | T49N-K50CG  |
| 49        | N    | 51        | CB   | 5.95         | 1.79            | T49N-T51CB  |
| 50        | NZ   | 1         | CE   | 3.83         | 0.10            | K50NZ-M1CE  |
| 50        | NZ   | 3         | CG   | 6.69         | 5.69            | K50NZ-Y3CG  |
| 50        | NZ   | 23        | CB   | 6.58         | 2.81            | K50NZ-A23CB |
| 50        | NZ   | 48        | CB   | 6.83         | 0.86            | K50NZ-A48CB |
| 50        | N    | 49        | CB   | 3.81         | 0.35            | K50N-T49CB  |
| 50        | N    | 49        | CG2  | 5.16         | 0.88            | K50N-T49CG2 |
| 50        | N    | 49        | CB   | 3.84         | 0.10            | K50N-T49CB  |
| 50        | N    | 49        | CG2  | 5.55         | 0.64            | K50N-T49CG2 |
| 50        | N    | 50        | CA   | 1.42         | 0.10            | K50N-CA     |
| 50        | N    | 50        | CB   | 2.51         | 0.23            | K50N-CB     |
| 50        | NZ   | 50        | CB   | 4.50         | 0.80            | K50NZ-CB    |
| 50        | N    | 50        | CD   | 3.32         | 0.10            | K50N-CD     |
| 50        | NZ   | 50        | CD   | 2.26         | 0.13            | K50NZ-CD    |
| 50        | NZ   | 50        | CE   | 1.59         | 0.10            | K50NZ-CE    |
| 50        | N    | 50        | CG   | 2.70         | 0.29            | K50N-CG     |
| 50        | NZ   | 50        | CG   | 3.74         | 0.27            | K50NZ-CG    |
| 50        | N    | 50        | CA   | 1.44         | 0.10            | K50N-CA     |
| 50        | N    | 50        | CB   | 2.43         | 0.10            | K50N-CB     |
| 50        | NZ   | 50        | CB   | 4.66         | 0.53            | K50NZ-CB    |
| 50        | N    | 50        | CD   | 3.40         | 0.10            | K50N-CD     |
| 50        | NZ   | 50        | CD   | 2.63         | 0.10            | K50NZ-CD    |
| 50        | NZ   | 50        | CE   | 2.20         | 1.10            | K50NZ-CE    |
| 50        | N    | 50        | CG   | 2.91         | 0.58            | K50N-CG     |
| 50        | N    | 51        | CB   | 5.16         | 1.74            | K50N-T51CB  |
| 50        | N    | 51        | CA   | 4.63         | 3.27            | K50N-T51CA  |

| Residue i | Atom | Residue j | Atom | Distance (Å) | Uncertainty (Å) | Label       |
|-----------|------|-----------|------|--------------|-----------------|-------------|
| 50        | N    | 51        | CB   | 5.51         | 0.79            | K50N-T51CB  |
| 51        | N    | 3         | CG   | 6.08         | 2.37            | T51N-Y3CG   |
| 51        | N    | 4         | CG   | 5.30         | 2.33            | T51N-K4CG   |
| 51        | N    | 45        | CG   | 5.08         | 0.55            | T51N-Y45CG  |
| 51        | N    | 49        | CB   | 5.23         | 1.16            | T51N-T49CB  |
| 51        | N    | 49        | CG2  | 5.12         | 0.90            | T51N-T49CG2 |
| 51        | N    | 49        | CB   | 4.81         | 0.56            | T51N-T49CB  |
| 51        | N    | 49        | CG2  | 7.41         | 6.41            | T51N-T49CG2 |
| 51        | N    | 50        | CB   | 4.24         | 0.68            | T51N-K50CB  |
| 51        | N    | 50        | CB   | 4.15         | 1.07            | T51N-K50CB  |
| 51        | N    | 50        | CG   | 4.96         | 0.35            | T51N-K50CG  |
| 51        | N    | 51        | CA   | 1.45         | 0.10            | T51N-CA     |
| 51        | N    | 51        | CB   | 2.50         | 0.11            | T51N-CB     |
| 51        | N    | 51        | CG2  | 3.23         | 1.10            | T51N-CG2    |
| 51        | N    | 51        | CA   | 1.43         | 0.10            | T51N-CA     |
| 51        | N    | 51        | CB   | 2.47         | 0.10            | T51N-CB     |
| 51        | N    | 51        | CG2  | 4.02         | 0.12            | T51N-CG2    |
| 52        | N    | 5         | CD2  | 4.87         | 0.10            | F52N-L5CD2  |
| 52        | N    | 6         | CD1  | 5.43         | 1.14            | F52N-I6CD1  |
| 52        | N    | 6         | CG2  | 5.56         | 2.28            | F52N-I6CG2  |
| 52        | N    | 6         | CD1  | 5.65         | 0.64            | F52N-I6CD1  |
| 52        | N    | 45        | CG   | 4.93         | 0.52            | F52N-Y45CG  |
| 52        | N    | 51        | CA   | 2.71         | 0.16            | F52N-T51CA  |
| 52        | N    | 51        | CB   | 3.68         | 0.10            | F52N-T51CB  |
| 52        | N    | 51        | CG2  | 3.18         | 0.15            | F52N-T51CG2 |
| 52        | N    | 51        | CA   | 2.59         | 0.15            | F52N-T51CA  |
| 52        | N    | 51        | CB   | 3.63         | 0.27            | F52N-T51CB  |
| 52        | N    | 51        | CG2  | 3.37         | 0.10            | F52N-T51CG2 |
| 52        | N    | 52        | CB   | 2.32         | 0.10            | F52N-CB     |
| 52        | N    | 52        | CA   | 1.43         | 0.10            | F52N-CA     |
| 52        | N    | 52        | CG   | 2.71         | 0.14            | F52N-CG     |
| 53        | N    | 5         | CD2  | 3.92         | 2.92            | T53N-L5CD2  |
| 53        | N    | 5         | CD2  | 3.70         | 0.10            | T53N-L5CD2  |
| 53        | N    | 6         | CG1  | 5.40         | 1.12            | T53N-I6CG1  |
| 53        | N    | 6         | CG2  | 5.81         | 4.81            | T53N-I6CG2  |
| 53        | N    | 6         | CD1  | 5.35         | 3.54            | T53N-I6CD1  |
| 53        | N    | 43        | CZ3  | 4.90         | 3.90            | T53N-W43CZ3 |
| 53        | N    | 44        | CB   | 4.79         | 0.59            | T53N-T44CB  |
| 53        | N    | 44        | CG2  | 3.66         | 0.10            | T53N-T44CG2 |
| 53        | N    | 52        | CA   | 2.64         | 0.16            | T53N-F52CA  |
| 53        | N    | 53        | CA   | 1.49         | 0.10            | T53N-CA     |
| 53        | N    | 53        | CG2  | 2.97         | 0.10            | T53N-CG2    |
| 53        | N    | 53        | CA   | 1.43         | 0.10            | T53N-CA     |
| 53        | N    | 53        | CG2  | 3.12         | 0.12            | T53N-CG2    |
| 53        | N    | 54        | CG1  | 6.13         | 2.44            | T53N-V54CG1 |
| 54        | N    | 5         | CD2  | 3.77         | 0.10            | V54N-L5CD2  |

| Residue i | Atom | Residue j | Atom | Distance (Å) | Uncertainty (Å) | Label       |
|-----------|------|-----------|------|--------------|-----------------|-------------|
| 54        | N    | 5         | CD2  | 3.67         | 0.10            | V54N-L5CD2  |
| 54        | N    | 6         | CD1  | 6.79         | 1.17            | V54N-I6CD1  |
| 54        | N    | 6         | CB   | 5.72         | 0.10            | V54N-I6CB   |
| 54        | N    | 6         | CD1  | 6.82         | 1.69            | V54N-I6CD1  |
| 54        | N    | 7         | CA   | 3.85         | 1.86            | V54N-L7CA   |
| 54        | N    | 43        | CZ3  | 4.55         | 0.10            | V54N-W43CZ3 |
| 54        | N    | 53        | CA   | 2.82         | 0.10            | V54N-T53CA  |
| 54        | N    | 54        | CA   | 1.45         | 0.10            | V54N-CA     |
| 54        | N    | 54        | CG1  | 3.04         | 0.12            | V54N-CG1    |
| 54        | N    | 54        | CG2  | 3.09         | 1.10            | V54N-CG2    |
| 54        | N    | 54        | CG1  | 3.18         | 2.18            | V54N-CG1    |
| 55        | N    | 54        | CA   | 2.66         | 0.15            | T55N-V54CA  |
| 55        | N    | 54        | CG1  | 4.15         | 0.10            | T55N-V54CG1 |
| 55        | N    | 54        | CG2  | 2.92         | 1.92            | T55N-V54CG2 |
| 55        | N    | 54        | CG1  | 4.20         | 0.10            | T55N-V54CG1 |
| 55        | N    | 55        | CA   | 1.43         | 0.10            | T55N-CA     |
| 55        | N    | 55        | CB   | 2.50         | 0.10            | T55N-CB     |
| 55        | N    | 55        | CG2  | 2.90         | 0.24            | T55N-CG2    |
| 55        | N    | 55        | CA   | 1.46         | 0.10            | T55N-CA     |
| 55        | N    | 55        | CB   | 2.48         | 0.15            | T55N-CB     |
| 55        | N    | 55        | CG2  | 3.46         | 0.10            | T55N-CG2    |
| 55        | N    | 56        | CD   | 6.50         | 2.64            | T55N-E56CD  |
| 55        | N    | 56        | CG   | 6.02         | 4.84            | T55N-E56CG  |
| 56        | N    | 10        | CD   | 5.71         | 1.51            | E56N-K10CD  |
| 56        | N    | 10        | CG   | 6.40         | 0.12            | E56N-K10CG  |
| 56        | N    | 54        | CG1  | 6.13         | 2.85            | E56N-V54CG1 |
| 56        | N    | 55        | CA   | 2.66         | 0.16            | E56N-T55CA  |
| 56        | N    | 55        | CB   | 3.67         | 0.10            | E56N-T55CB  |
| 56        | N    | 55        | CG2  | 2.89         | 1.52            | E56N-T55CG2 |
| 56        | N    | 55        | CA   | 2.61         | 0.18            | E56N-T55CA  |
| 56        | N    | 55        | CB   | 3.66         | 0.10            | E56N-T55CB  |
| 56        | N    | 55        | CG2  | 3.47         | 1.10            | E56N-T55CG2 |
| 56        | N    | 56        | CA   | 1.44         | 0.10            | E56N-CA     |
| 56        | N    | 56        | CB   | 2.96         | 1.10            | E56N-CB     |
| 56        | N    | 56        | CG   | 2.50         | 0.10            | E56N-CG     |
| 56        | N    | 56        | CA   | 1.44         | 0.28            | E56N-CA     |
| 56        | N    | 56        | CB   | 2.45         | 0.10            | E56N-CB     |
| 56        | N    | 56        | CG   | 2.48         | 0.25            | E56N-CG     |



**Table S3.** Dihedral Restraints

| Residue | Angle  | Value | Error |
|---------|--------|-------|-------|
| 2       | $\Phi$ | -109  | 17    |
| 2       | $\Psi$ | 136   | 13    |
| 3       | $\Phi$ | -130  | 14    |
| 3       | $\Psi$ | 153   | 15    |
| 4       | $\Phi$ | -137  | 17    |
| 4       | $\Psi$ | 136   | 7     |
| 5       | $\Phi$ | -115  | 16    |
| 5       | $\Psi$ | 122   | 16    |
| 6       | $\Phi$ | -108  | 6     |
| 6       | $\Psi$ | 120   | 12    |
| 7       | $\Phi$ | -103  | 9     |
| 7       | $\Psi$ | 119   | 11    |
| 8       | $\Phi$ | -100  | 17    |
| 8       | $\Psi$ | 142   | 26    |
| 11      | $\Phi$ | -94   | 17    |
| 11      | $\Psi$ | -6    | 14    |
| 12      | $\Phi$ | -113  | 25    |
| 12      | $\Psi$ | 124   | 27    |
| 13      | $\Phi$ | -134  | 10    |
| 13      | $\Psi$ | 156   | 16    |
| 14      | $\Phi$ | -153  | 15    |
| 14      | $\Psi$ | 159   | 23    |
| 15      | $\Phi$ | -129  | 12    |
| 15      | $\Psi$ | 151   | 12    |
| 16      | $\Phi$ | -125  | 21    |
| 16      | $\Psi$ | 153   | 23    |
| 17      | $\Phi$ | -134  | 10    |
| 17      | $\Psi$ | 152   | 20    |
| 18      | $\Phi$ | -130  | 25    |
| 18      | $\Psi$ | 137   | 14    |
| 19      | $\Phi$ | -117  | 10    |
| 19      | $\Psi$ | 122   | 16    |
| 20      | $\Phi$ | -124  | 28    |
| 20      | $\Psi$ | 160   | 16    |
| 23      | $\Phi$ | -63   | 10    |
| 23      | $\Psi$ | -35   | 11    |
| 24      | $\Phi$ | -65   | 6     |
| 24      | $\Psi$ | -38   | 7     |
| 25      | $\Phi$ | -66   | 9     |
| 25      | $\Psi$ | -38   | 8     |
| 26      | $\Phi$ | -62   | 5     |
| 26      | $\Psi$ | -41   | 3     |
| 27      | $\Phi$ | -66   | 8     |
| 27      | $\Psi$ | -37   | 17    |

| Residue | Angle  | Value | Error |
|---------|--------|-------|-------|
| 28      | $\Phi$ | -65   | 4     |
| 28      | $\Psi$ | -41   | 5     |
| 29      | $\Phi$ | -64   | 4     |
| 29      | $\Psi$ | -46   | 4     |
| 30      | $\Phi$ | -67   | 4     |
| 30      | $\Psi$ | -35   | 7     |
| 31      | $\Phi$ | -66   | 7     |
| 31      | $\Psi$ | -41   | 10    |
| 32      | $\Phi$ | -66   | 7     |
| 32      | $\Psi$ | -43   | 9     |
| 33      | $\Phi$ | -67   | 5     |
| 33      | $\Psi$ | -37   | 9     |
| 34      | $\Phi$ | -66   | 5     |
| 34      | $\Psi$ | -42   | 4     |
| 35      | $\Phi$ | -64   | 7     |
| 35      | $\Psi$ | -37   | 11    |
| 36      | $\Phi$ | -61   | 5     |
| 36      | $\Psi$ | -31   | 8     |
| 37      | $\Phi$ | -102  | 16    |
| 37      | $\Psi$ | 8     | 16    |
| 38      | $\Phi$ | 83    | 11    |
| 38      | $\Psi$ | 14    | 9     |
| 39      | $\Phi$ | -101  | 20    |
| 39      | $\Psi$ | 125   | 15    |
| 40      | $\Phi$ | -98   | 27    |
| 40      | $\Psi$ | 139   | 28    |
| 42      | $\Phi$ | -98   | 22    |
| 42      | $\Psi$ | 133   | 16    |
| 43      | $\Phi$ | -122  | 16    |
| 43      | $\Psi$ | 160   | 10    |
| 44      | $\Phi$ | -133  | 23    |
| 44      | $\Psi$ | 152   | 17    |
| 45      | $\Phi$ | -119  | 28    |
| 45      | $\Psi$ | 126   | 24    |
| 46      | $\Phi$ | -105  | 18    |
| 46      | $\Psi$ | 140   | 26    |
| 48      | $\Phi$ | -66   | 13    |
| 48      | $\Psi$ | -21   | 15    |
| 49      | $\Phi$ | -110  | 9     |
| 49      | $\Psi$ | 10    | 13    |
| 51      | $\Phi$ | -105  | 43    |
| 51      | $\Psi$ | 134   | 16    |
| 52      | $\Phi$ | -121  | 13    |
| 52      | $\Psi$ | 150   | 16    |
| 53      | $\Phi$ | -133  | 11    |
| 53      | $\Psi$ | 144   | 17    |

| Residue | Angle  | Value | Error |
|---------|--------|-------|-------|
| 54      | $\Phi$ | -131  | 16    |
| 54      | $\Psi$ | 139   | 14    |
| 55      | $\Phi$ | -110  | 14    |
| 55      | $\Psi$ | 128   | 12    |

**Table S4.** XPLOR-NIH Calculation Energies

| <b>Orthorhombic Refine</b> | Average<br>(kcal/mol) | Standard Deviation<br>(kcal/mol) |
|----------------------------|-----------------------|----------------------------------|
| ANGL                       | 385                   | 20                               |
| BOND                       | 225                   | 6                                |
| CDIH                       | 35                    | 5                                |
| IMPR                       | 50                    | 9                                |
| Distance                   | 1391                  | 16                               |
| posDiff                    | 236                   | 42                               |
| VDW                        | 148                   | 12                               |
| TOTAL                      | 2470                  | 24                               |
| <b>Trigonal Refine</b>     |                       |                                  |
| ANGL                       | 623                   | 13                               |
| BOND                       | 169                   | 6                                |
| CDIH                       | 61                    | 5                                |
| IMPR                       | 93                    | 7                                |
| Distance                   | 1215                  | 27                               |
| posDiff                    | 150                   | 23                               |
| VDW                        | 500                   | 19                               |
| TOTAL                      | 2811                  | 27                               |
| <b>De novo Annealing</b>   |                       |                                  |
| ANGL                       | 909                   | 23                               |
| BOND                       | 421                   | 7                                |
| CDIH                       | 107                   | 5                                |
| IM Distance                | 198                   | 12                               |
| IMPR                       | 156                   | 5                                |
| Distance                   | 1730                  | 17                               |
| posDiff                    | 190                   | 7                                |
| VDW                        | 773                   | 24                               |
| TOTAL                      | 4484                  | 20                               |

References:

- (1) Franks, W. T.; Wylie, B. J.; Schmidt, H. L. F.; Nieuwkoop, A. J.; Mayrhofer, R. M.; Shah, G. J.; Graesser, D. T.; Rienstra, C. M. *Proc. Nat. Acad. Sci. U.S.A.* **2008**, *105*, 4621.
- (2) Nieuwkoop, A. J.; Wylie, B. J.; Franks, W. T.; Shah, G. J.; Rienstra, C. M. *J. Chem. Phys.* **2009**, *131*, 095101.
- (3) Franks, W. T.; Wylie, B. J.; Stellfox, S. A.; Rienstra, C. M. *J. Am. Chem. Soc.* **2006**, *128*, 3154.
- (4) Frericks Schmidt, H. L.; Sperling, L. J.; Gao, Y. G.; Wylie, B. J.; Boettcher, J. M.; Wilson, S. R.; Rienstra, C. M. *J. Phys. Chem. B* **2007**, *111*, 14362.
- (5) Guex, N.; Peitsch, M.C. *Electrophoresis* **1997**, *18*, 2714.
- (6) Schwieters, C. D.; Clore, G. M., *J. Magn. Reson.* **2001**, *149*, 239.
- (7) Schwieters, C. D.; Kuszewski, J. J.; Tjandra, N.; Clore, G. M. *J. Magn. Reson.* **2003**, *160*, 65.
